# Supplementary material
Source: PubMed Central journal article supplement (PMC4664189)
Supplement: NIHMS739756-supplement-Supporting_Info.pdf [file NIHMS739756-supplement-Supporting_Info.pdf]

## Synthesis and Immunological Studies of Linear Oligosaccharides of $\beta$ -Glucan as Antigens for Anti-Fungal Vaccine Development

Guochao Liao,<sup>a†</sup> Zhifang Zhou,<sup>a†</sup> Srinivas Burgula,<sup>a</sup> Jun Liao,<sup>a,b</sup> Cheng Yuan,<sup>c</sup> Qiuye Wu,<sup>b</sup>  
and Zhongwu Guo<sup>a\*</sup>

*a) Department of Chemistry, Wayne State University, 5101 Cass Avenue, Detroit, MI, 48202, USA*

*b) School of Pharmacy, Second Military Medical University, 325 Guohe Road, Shanghai 200433, China*

*c) Department of Pharmacy, Shanghai East Hospital, Tongji University, Jimo Road, Shanghai 200120, China*

E-mail: zwguo@chem.wayne.edu

### Table of Contents:

|                                                                  |    |
|------------------------------------------------------------------|----|
| I. Calculated antibody titers of various ELISA experiments ..... | S1 |
| II. NMR and MS spectra of synthesized compounds .....            | S3 |

### I. Calculated Antibody Titers of Various ELISA Experiments

**Table S-1:** Antibody titers induced by conjugate 1

| Mouse # | 1    | 2    | 3     | 4    | 5     | 6      | Average | SD    |
|---------|------|------|-------|------|-------|--------|---------|-------|
| kappa   | 26   | 6673 | 23277 | 1166 | 22543 | 49127  | 17135   | 18696 |
| IgG1    | 5569 | 3593 | 285   | 0    | 13220 | 58324  | 13498   | 22482 |
| IgG2a   | 0    | 0    | 0     | 0    | 0     | 0      | 0       | 0     |
| IgG2b   | 0    | 0    | 20251 | 0    | 405   | 12762  | 5570    | 8798  |
| IgG3    | 66   | 6528 | 0     | 0    | 0     | 57061  | 10609   | 22905 |
| IgM     | 5473 | 41   | 8     | 5211 | 7342  | 102187 | 20044   | 40355 |

**Table S-2:** Antibody titers induced by conjugate 2

| Mouse # | 1    | 2     | 3      | 4      | 5     | 6     | Average | SD    |
|---------|------|-------|--------|--------|-------|-------|---------|-------|
| kappa   | 3717 | 57177 | 114125 | 65939  | 55022 | 47983 | 57327   | 35403 |
| IgG1    | 125  | 70980 | 172826 | 140541 | 78955 | 49184 | 85435   | 62477 |
| IgG2a   | 0    | 0     | 0      | 0      | 0     | 0     | 0       | 0     |
| IgG2b   | 51   | 26578 | 68697  | 253    | 102   | 2     | 15947   | 27928 |
| IgG3    | 1    | 40975 | 27647  | 1      | 2     | 12    | 11440   | 18210 |
| IgM     | 2162 | 38087 | 45483  | 32135  | 8436  | 73711 | 33336   | 26052 |

**Table S-3:** Antibody titers induced by conjugate 3

| Mouse # | 1     | 2    | 3     | 4      | Average | SD    |
|---------|-------|------|-------|--------|---------|-------|
| kappa   | 63764 | 1496 | 67279 | 67455  | 49998   | 32380 |
| IgG1    | 53163 | 2    | 95510 | 109124 | 64450   | 49131 |
| IgG2a   | 0     | 0    | 0     | 0      | 0       | 0     |
| IgG2b   | 8271  | 0    | 61492 | 34461  | 26056   | 27818 |
| IgG3    | 58109 | 103  | 37301 | 27645  | 30789   | 24085 |
| IgM     | 35849 | 2135 | 46170 | 42884  | 31759   | 20214 |

**Table S-4:** Antibody titers induced by conjugate 4

| Mouse # | 1     | 2     | 3     | 4     | 5     | 6      | Average | SD    |
|---------|-------|-------|-------|-------|-------|--------|---------|-------|
| kappa   | 13328 | 53453 | 12192 | 31169 | 24779 | 85058  | 36663   | 28067 |
| IgG1    | 25459 | 37160 | 3563  | 40853 | 34196 | 173046 | 52380   | 60602 |
| IgG2a   | 0     | 0     | 0     | 0     | 0     | 0      | 0       | 0     |
| IgG2b   | 99    | 30972 | 2251  | 3866  | 7294  | 50711  | 15866   | 20464 |
| IgG3    | 19    | 23746 | 0     | 40791 | 37    | 80927  | 24253   | 32396 |
| IgM     | 24949 | 50422 | 27435 | 3647  | 12219 | 61883  | 30093   | 22254 |

SD: standard deviation

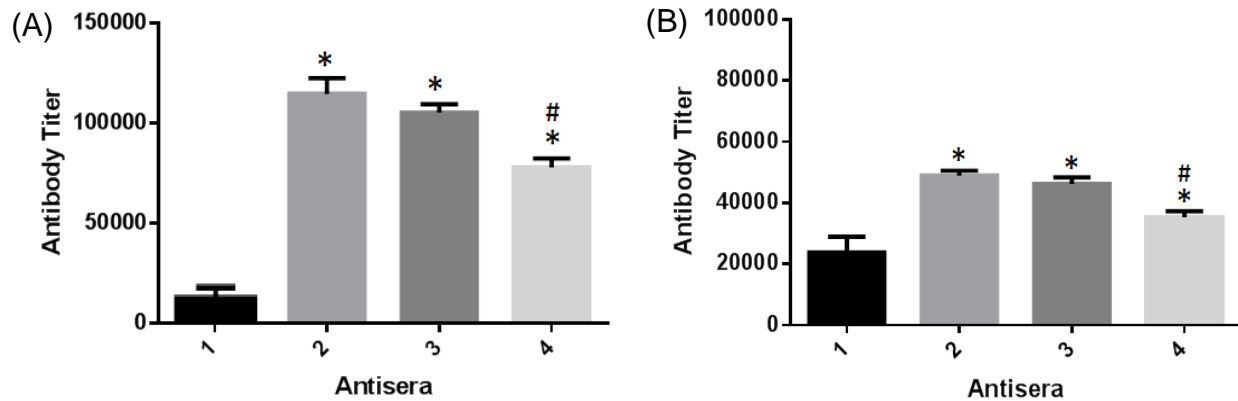

**Figure S-1.** Comparison of the average antibody titers of corresponding antigen-specific (A) total IgG antibodies and (B) total IgM antibodies in the day 48 pooled antisera of mice immunized with conjugates 1-4, respectively. The error bar is the standard deviation of three parallel experiments. \*  $P < 0.01$  as compared to 1; #  $P < 0.05$  as compared to 2.

## II. NMR and MS Spectra of Synthesized Compounds.

BSR-II-15-H1

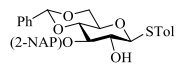**10** $^1\text{H-NMR}$ (400 MHz,  $\text{CDCl}_3$ )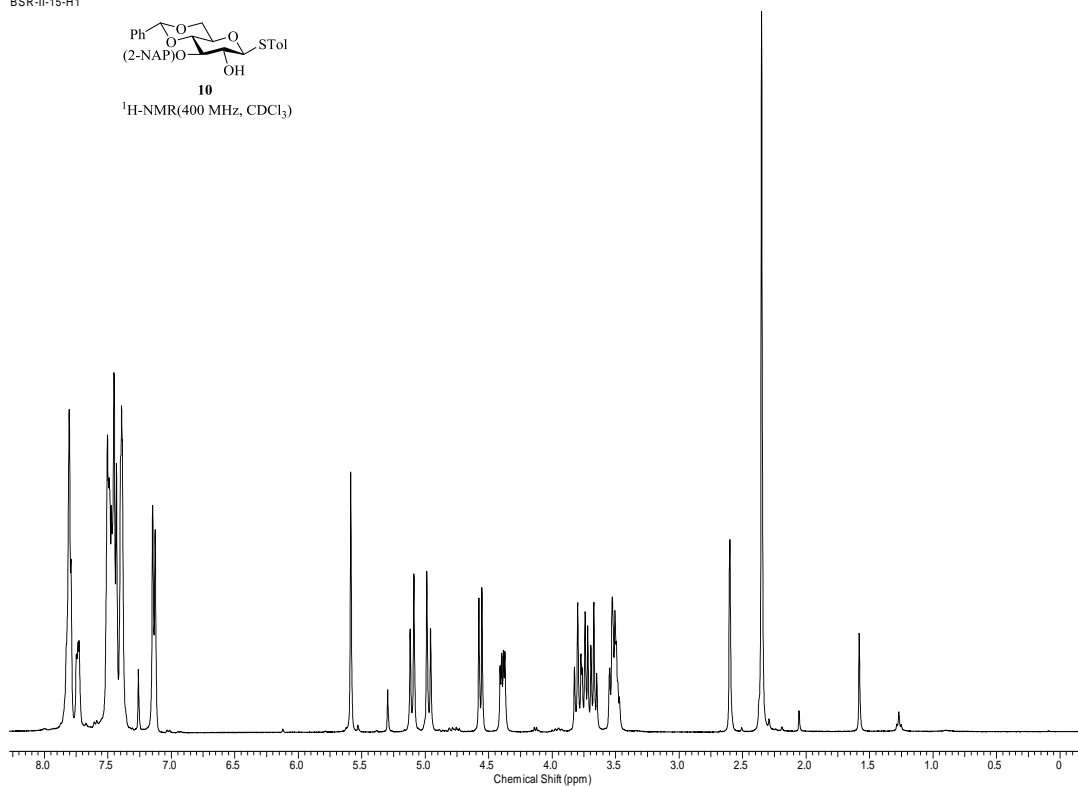

BSR-II-15-C13

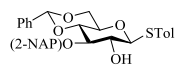**10** $^{13}\text{C-NMR}$  (100 MHz,  $\text{CDCl}_3$ )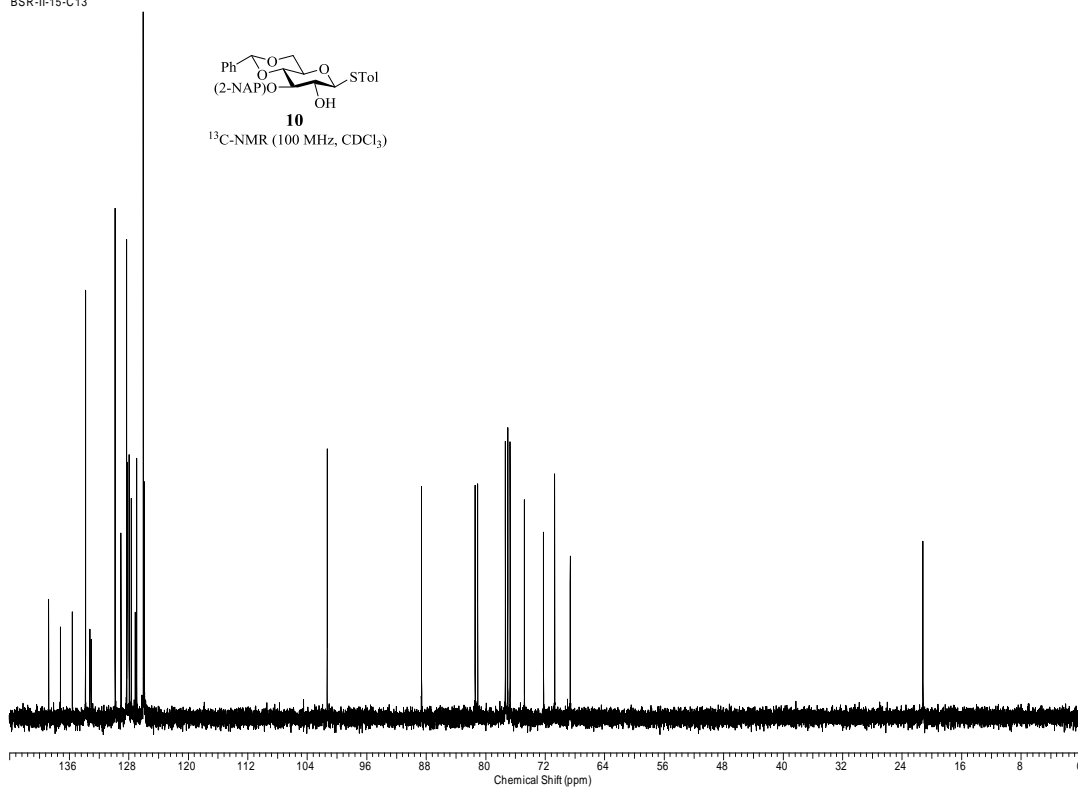

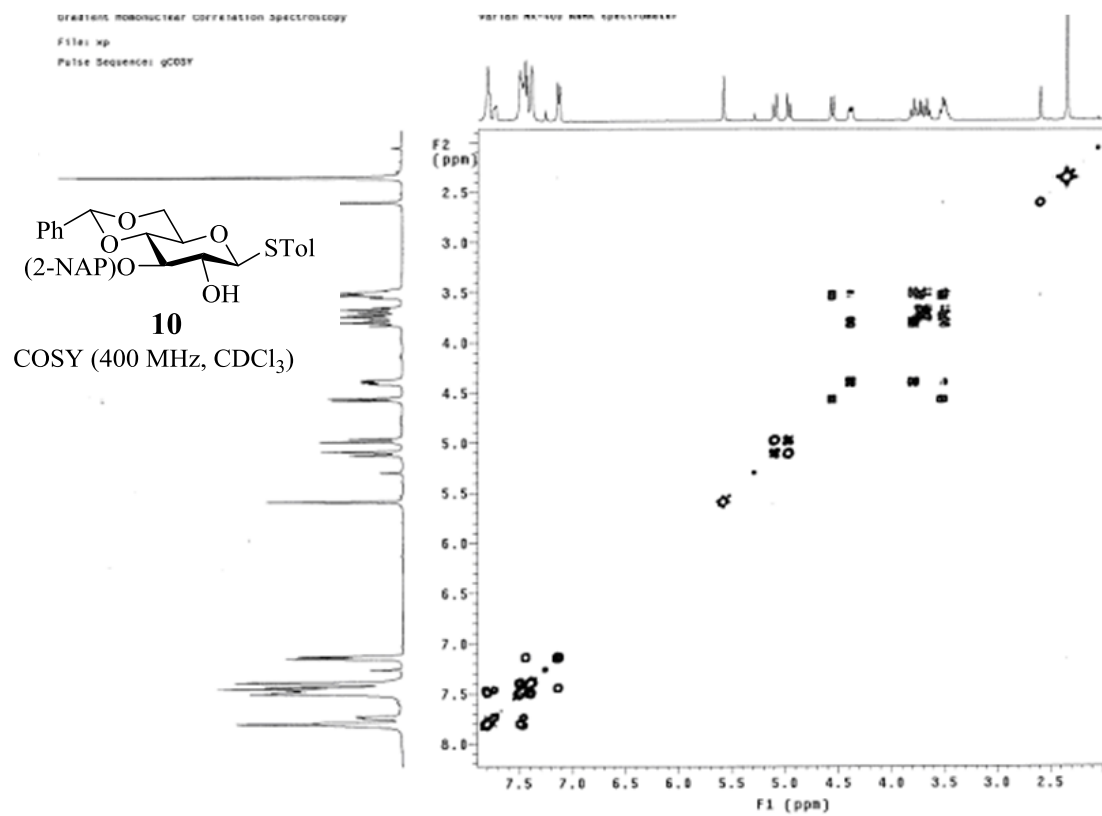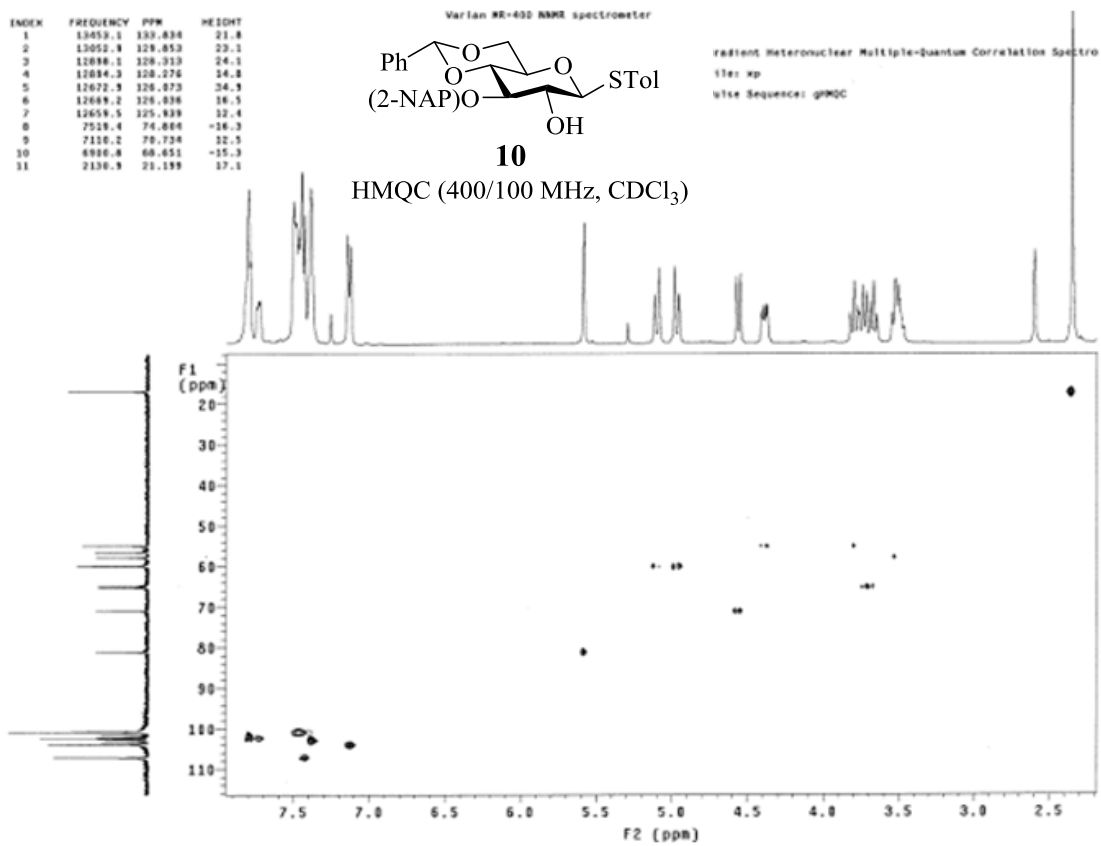

BS-II-16-1H

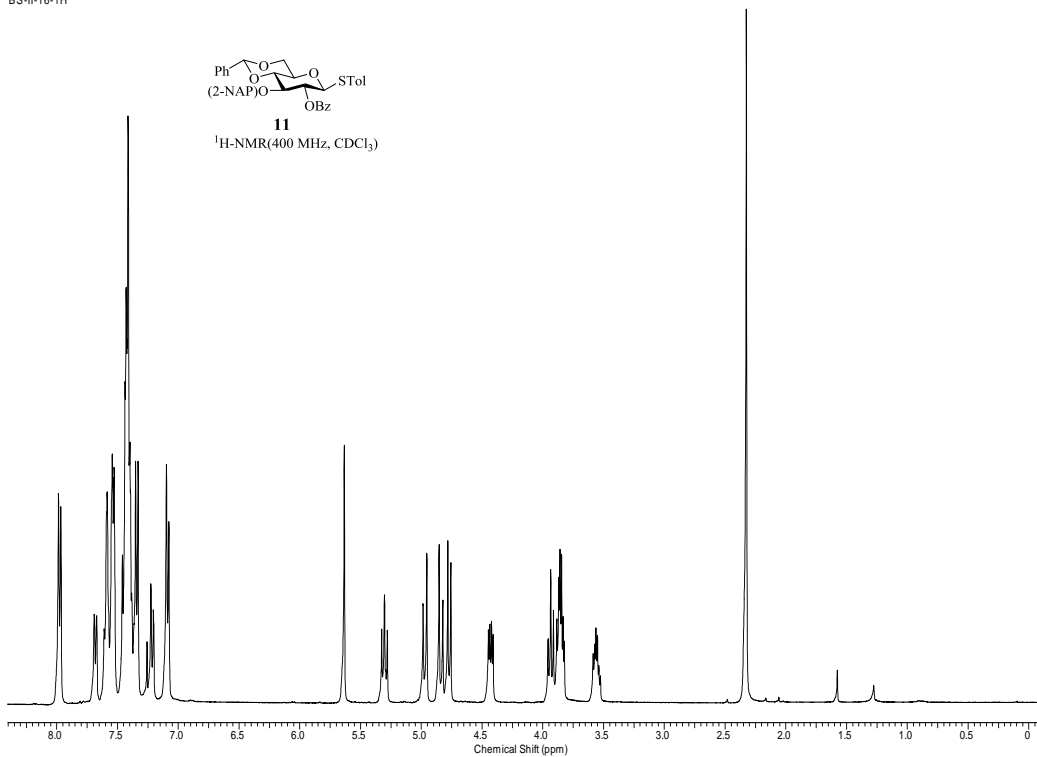

BS-II-16-13C

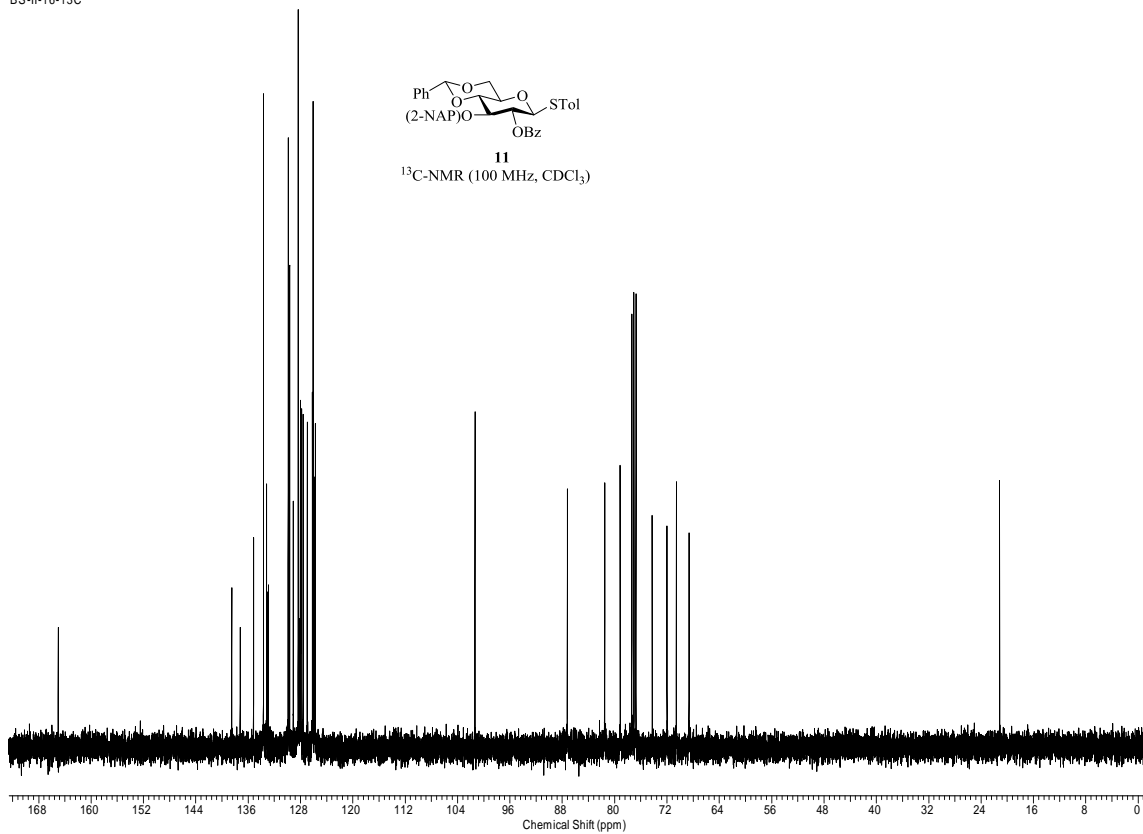

| INDEX | FREQUENCY | PPM     | HEIGHT |
|-------|-----------|---------|--------|
| 1     | 16790.6   | 133.628 | 24.6   |
| 2     | 16317.0   | 128.507 | 20.8   |
| 3     | 16289.6   | 128.688 | 22.0   |
| 4     | 16124.6   | 128.374 | 34.7   |
| 5     | 16084.6   | 128.055 | 12.6   |
| 6     | 16029.0   | 127.615 | 12.4   |
| 7     | 15950.9   | 128.194 | 12.8   |
| 8     | 15838.8   | 128.100 | 22.0   |
| 9     | 8961.3    | 78.148  | 12.5   |
| 10    | 8330.1    | 74.283  | -15.0  |
| 11    | 8422.0    | 68.646  | -14.0  |
| 12    | 2861.8    | 21.192  | 13.2   |

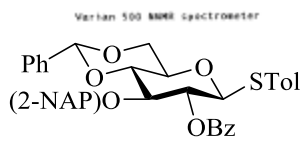

160-0,1-ethylbenzen-std-ds14-88  
f1: xp  
is: Sequence: gHMQC

11

HMQC (400/100 MHz, CDCl<sub>3</sub>)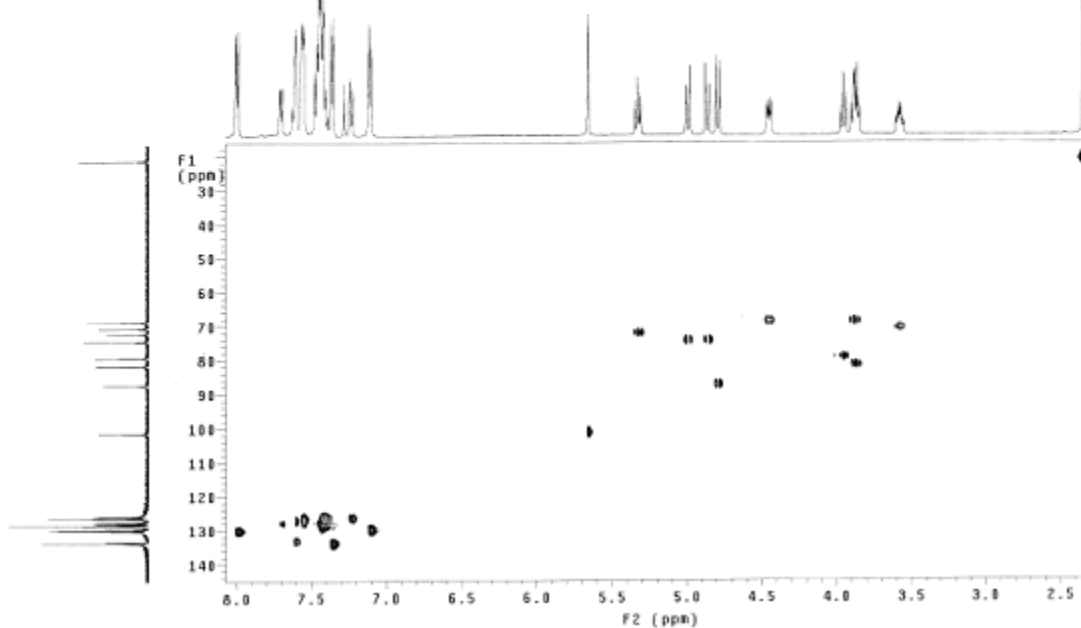

Gradient Heteronuclear Correlation Spectroscopy

File: xp

Pulse Sequence: gCOSY

Varian 400 NMR spectrometer

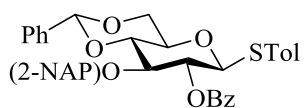

11

COSY (400 MHz, CDCl<sub>3</sub>)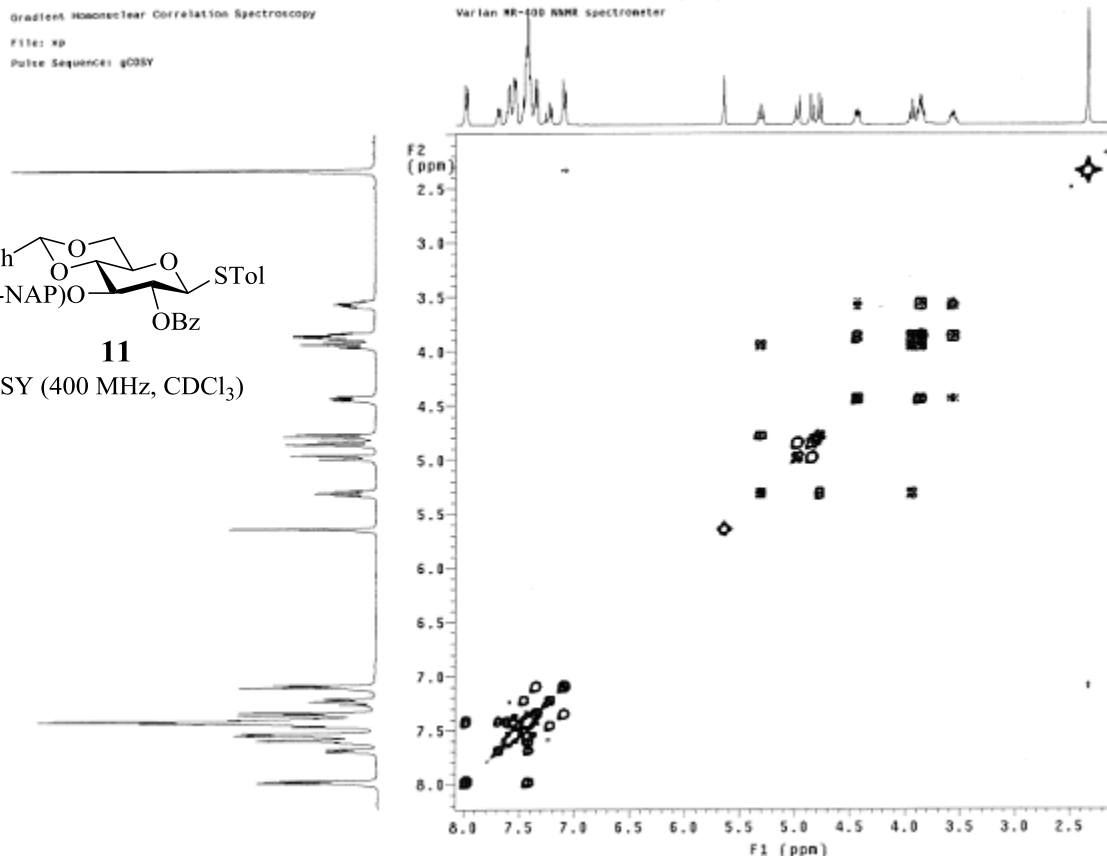

BSR-II-20-1H

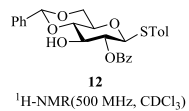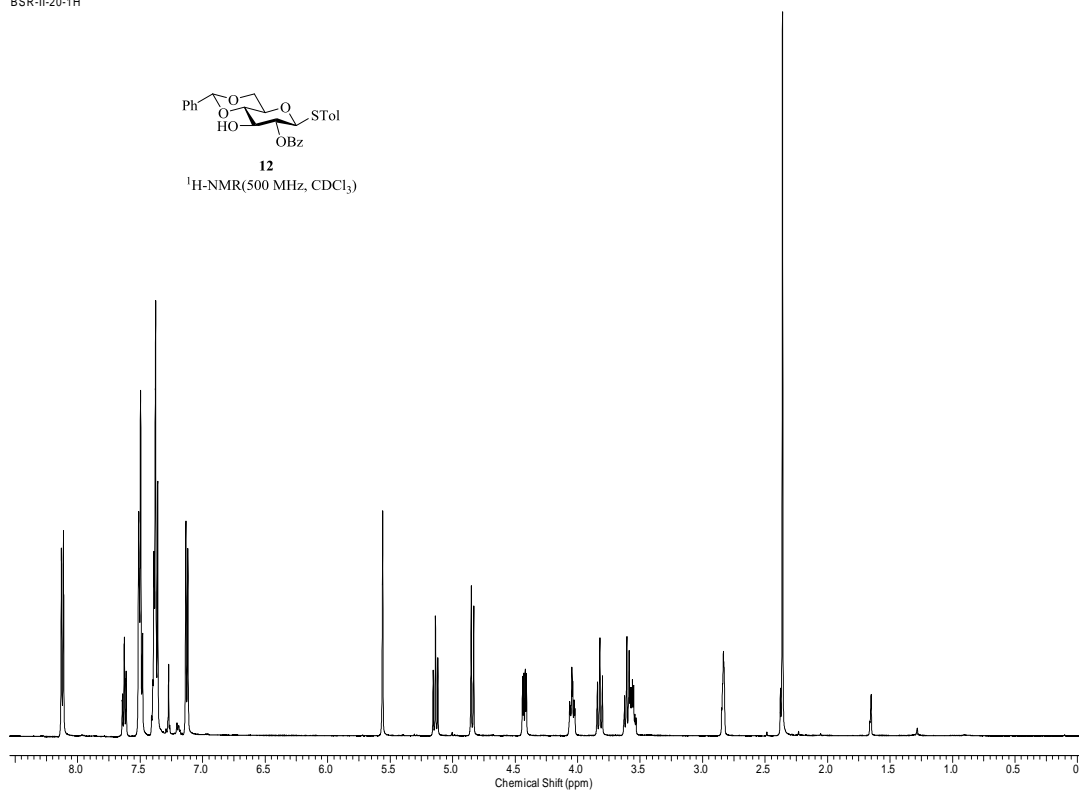

BSR-II-20-C13

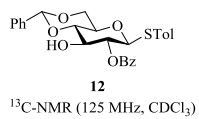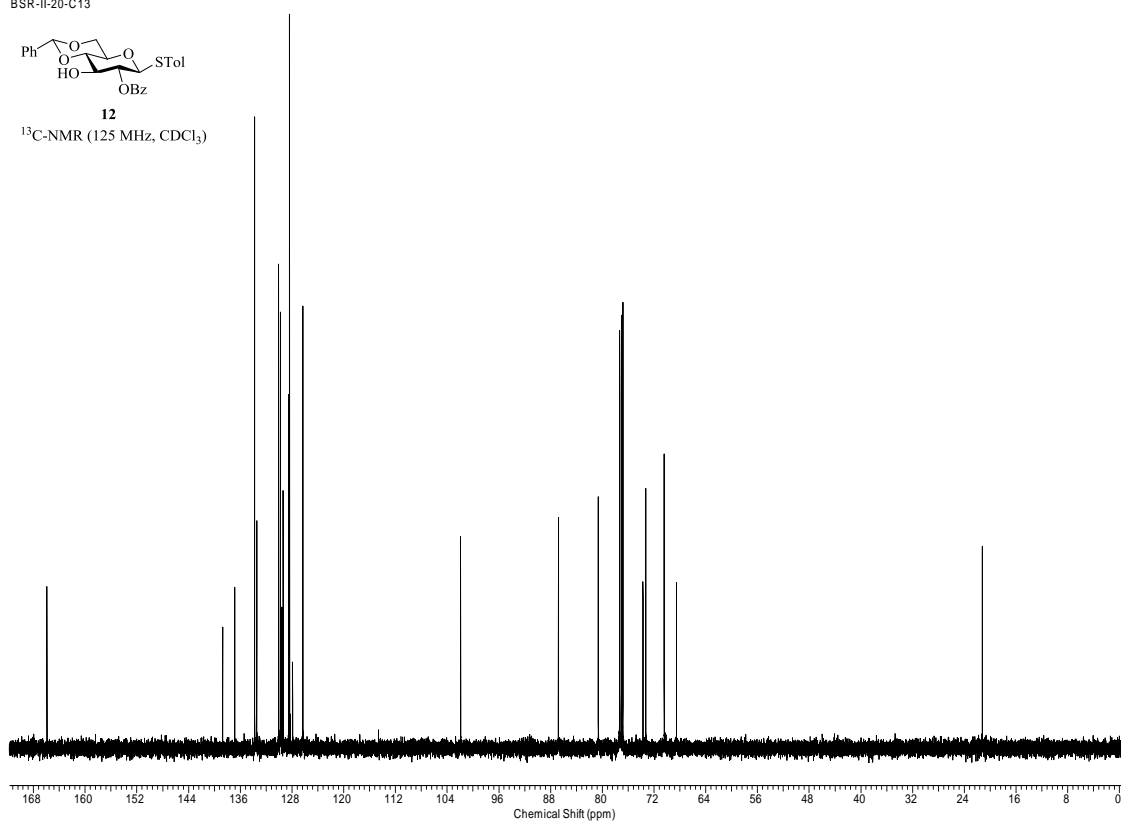

S8

| INDEX | FREQUENCY | PPM     | HEIGHT |
|-------|-----------|---------|--------|
| 1     | 16084.1   | 133.785 | 33.7   |
| 2     | 16764.5   | 133.470 | 13.8   |
| 3     | 16337.3   | 128.074 | 25.8   |
| 4     | 16389.7   | 128.778 | 28.2   |
| 5     | 16249.6   | 128.370 | 15.2   |
| 6     | 16140.2   | 128.580 | 28.7   |
| 7     | 16126.7   | 128.392 | 24.6   |
| 8     | 15868.1   | 124.333 | 27.2   |
| 9     | 12882.4   | 101.826 | 19.4   |
| 10    | 10982.5   | 86.880  | 13.6   |
| 11    | 10127.4   | 89.828  | 13.1   |
| 12    | 9282.4    | 73.286  | 12.8   |
| 13    | 8845.3    | 78.422  | 13.4   |
| 14    | 8037.8    | 68.528  | -15.8  |
| 15    | 2665.5    | 21.221  | 12.7   |

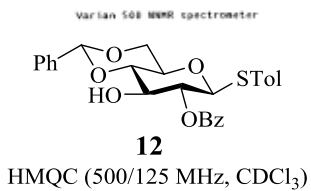

proton=0.1-ethylbenzen-std-dec14-06  
File: xp  
Pulse Sequence: ghmoc

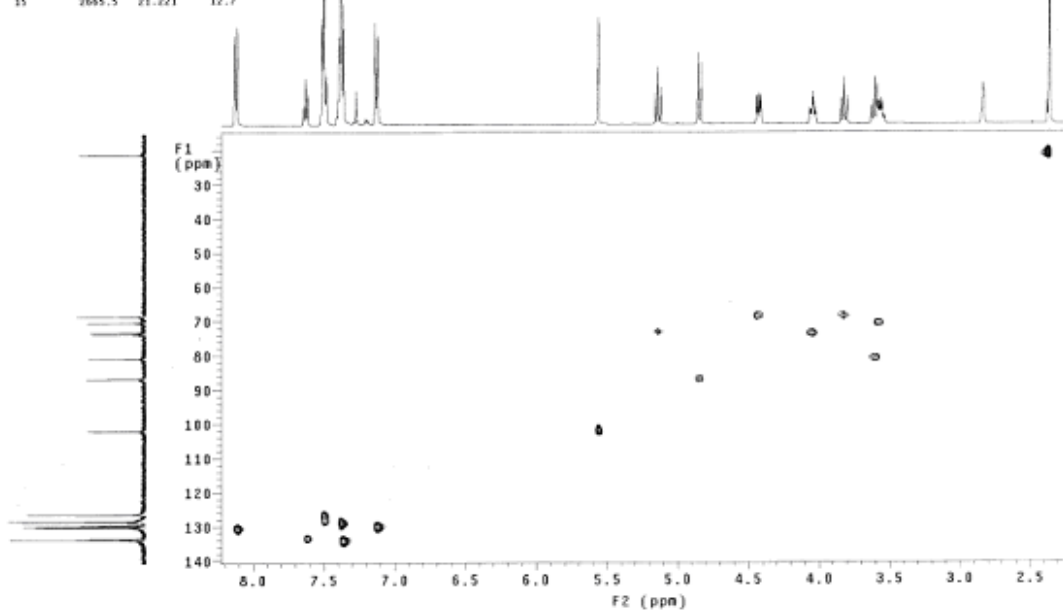

proton=0.1-ethylbenzen-std-dec14-06  
File: xp  
Pulse Sequence: gcosy

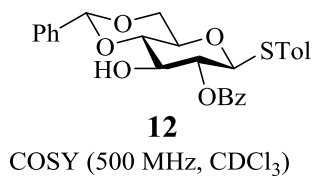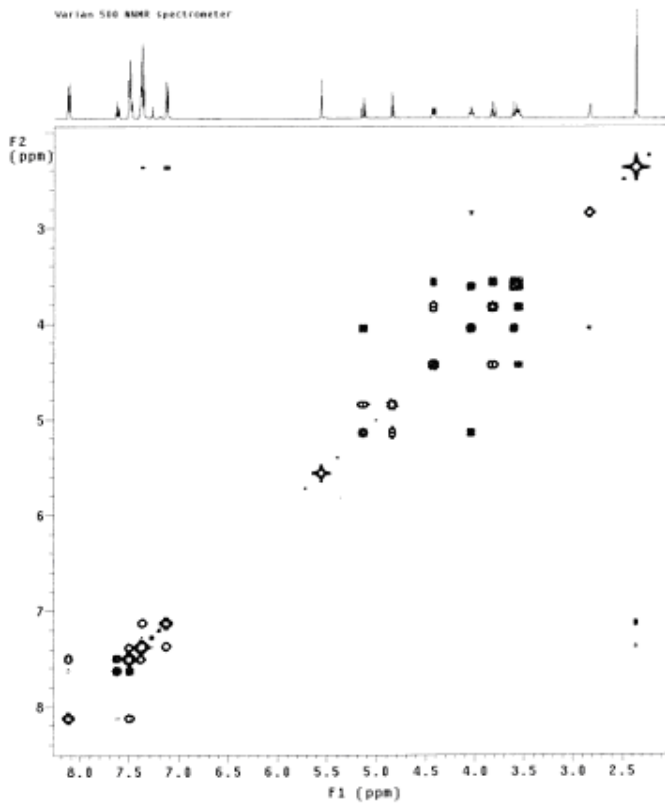



BSR-II-31-H1

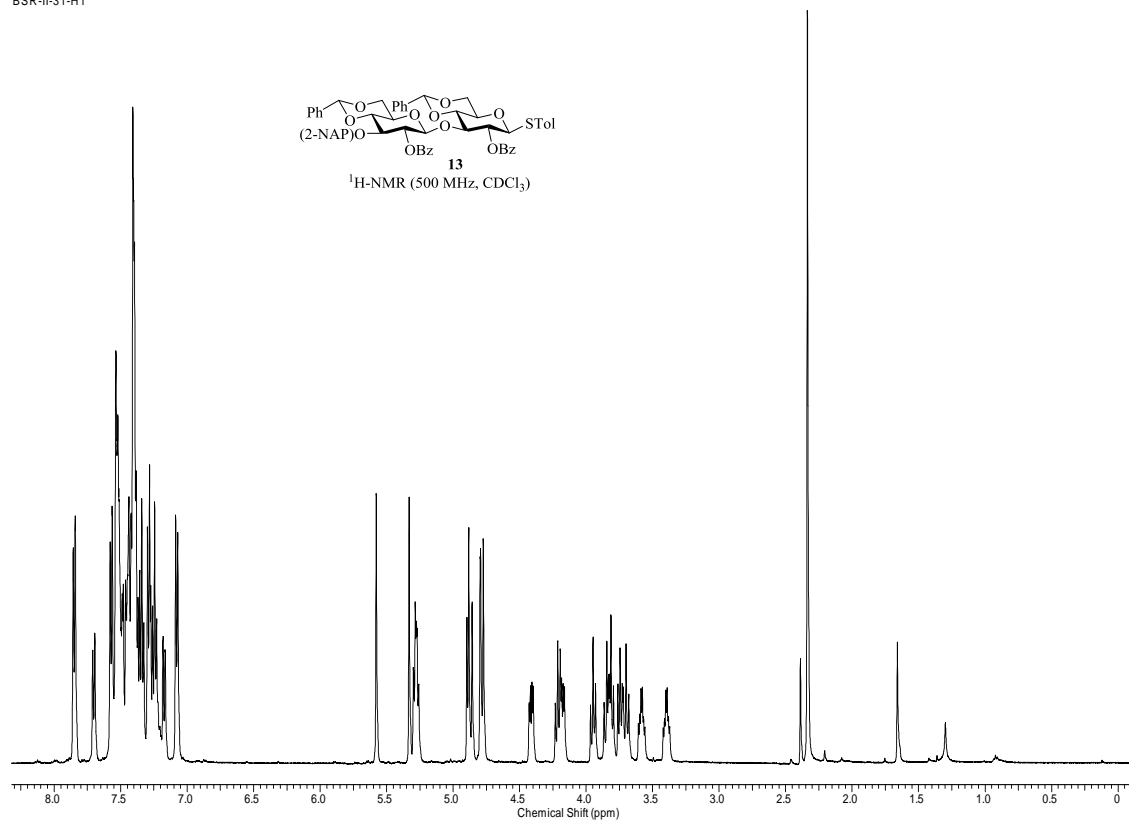

BSR-II-31-13C

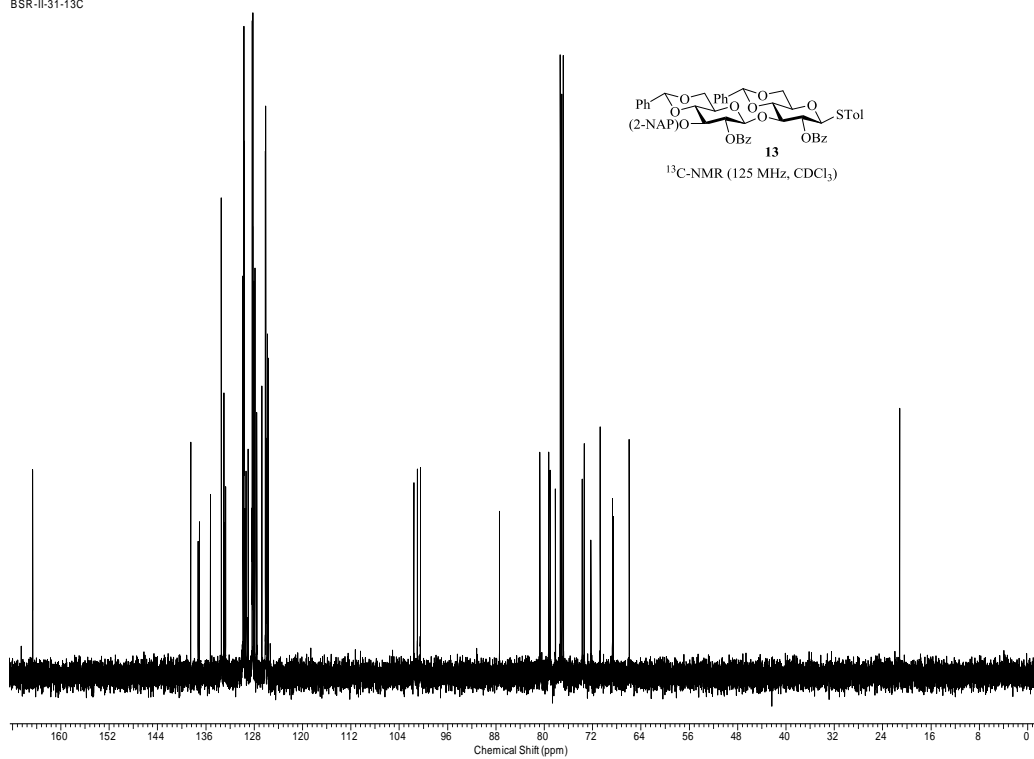

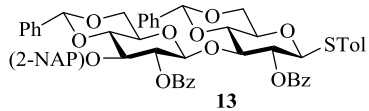

HMQC (500/125 MHz, CDCl<sub>3</sub>)

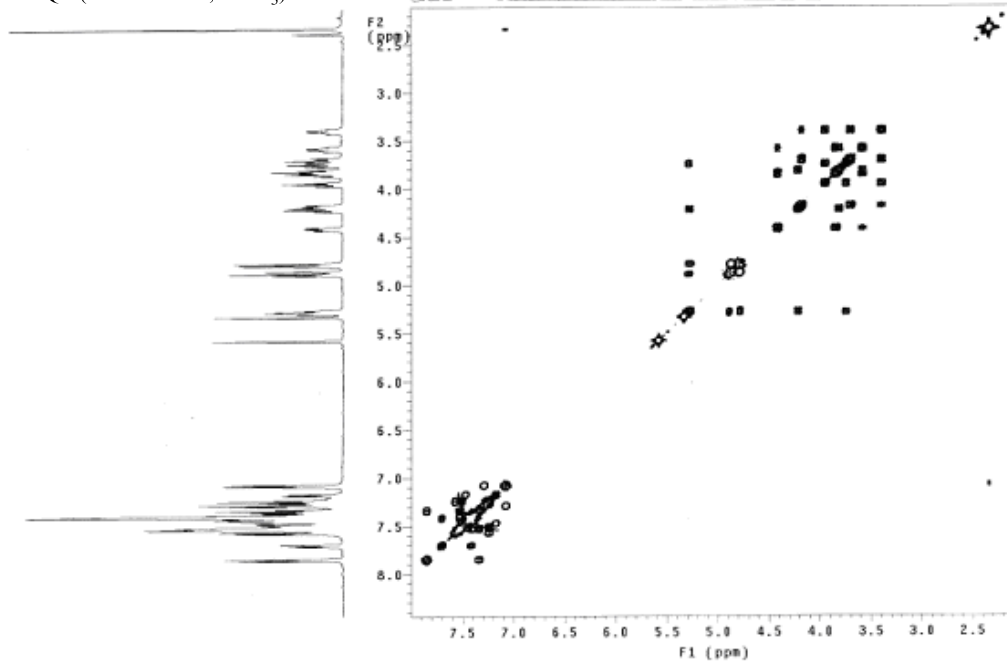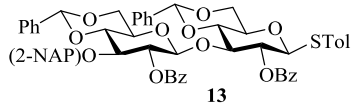

COSY (500 MHz, CDCl<sub>3</sub>)

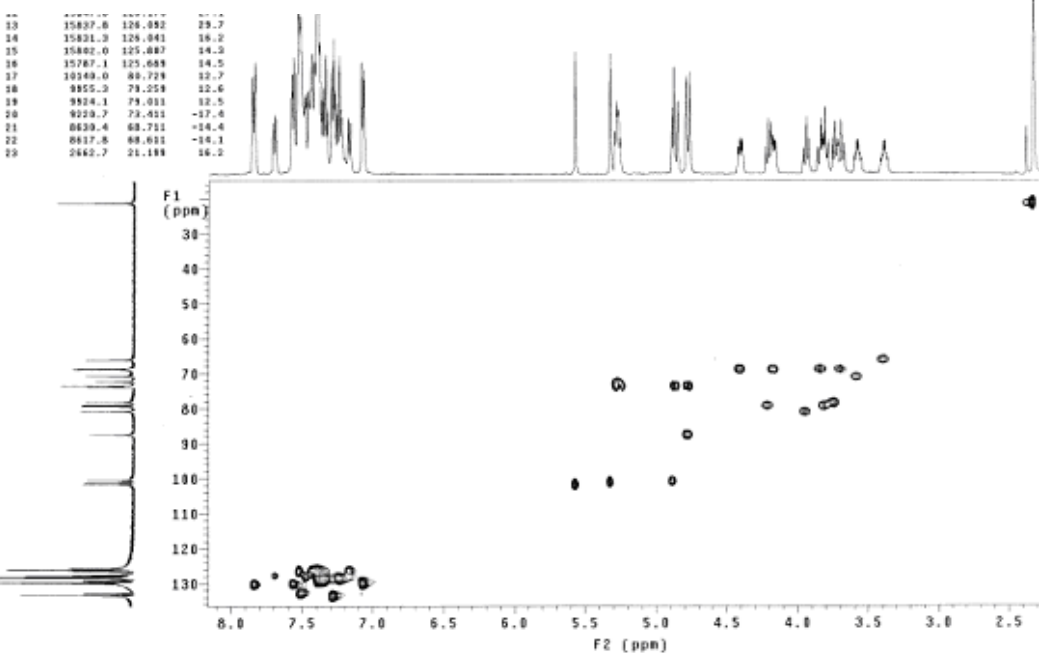

BSR-II-32-H1

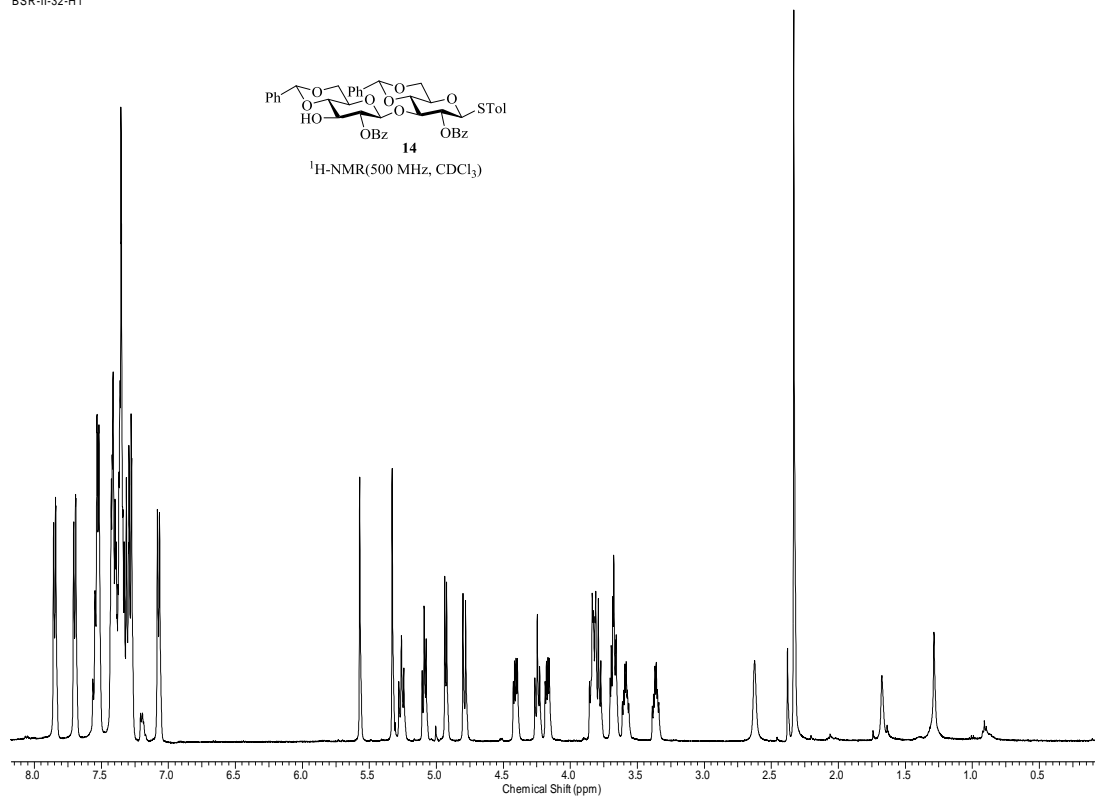

BSR-II-32-C13

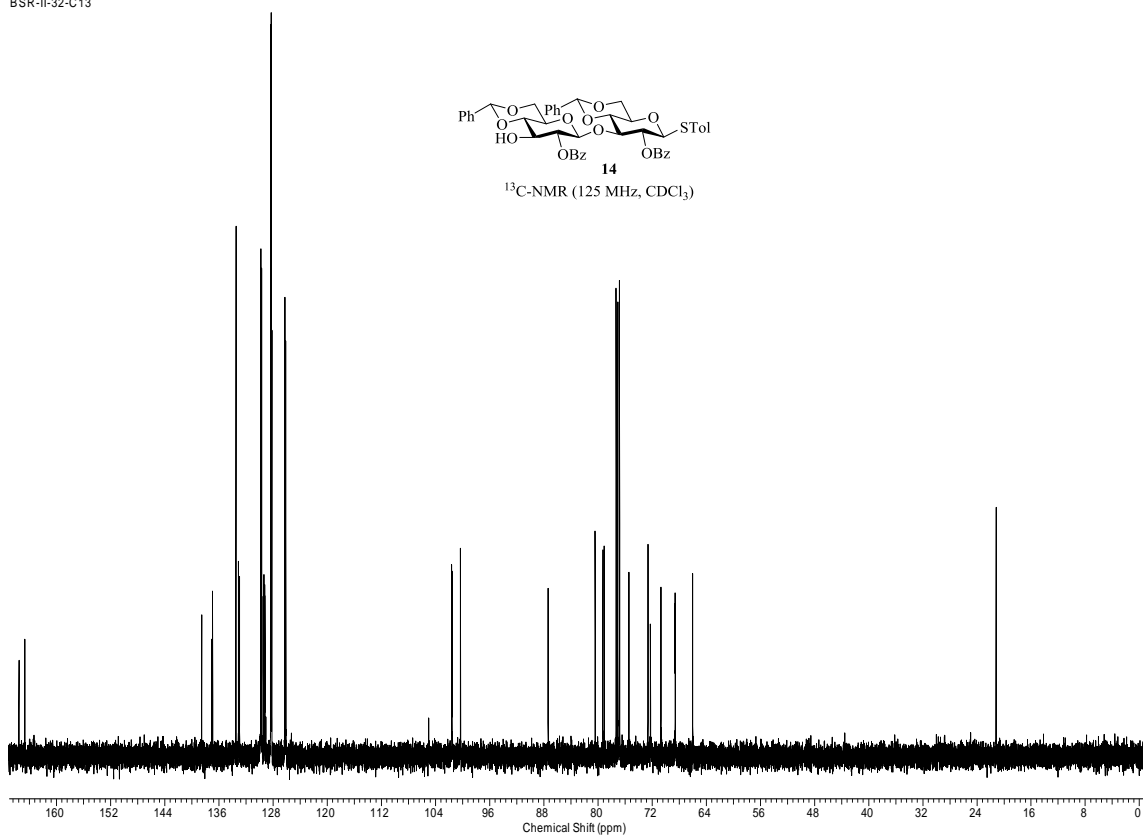

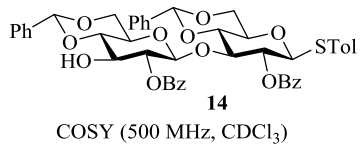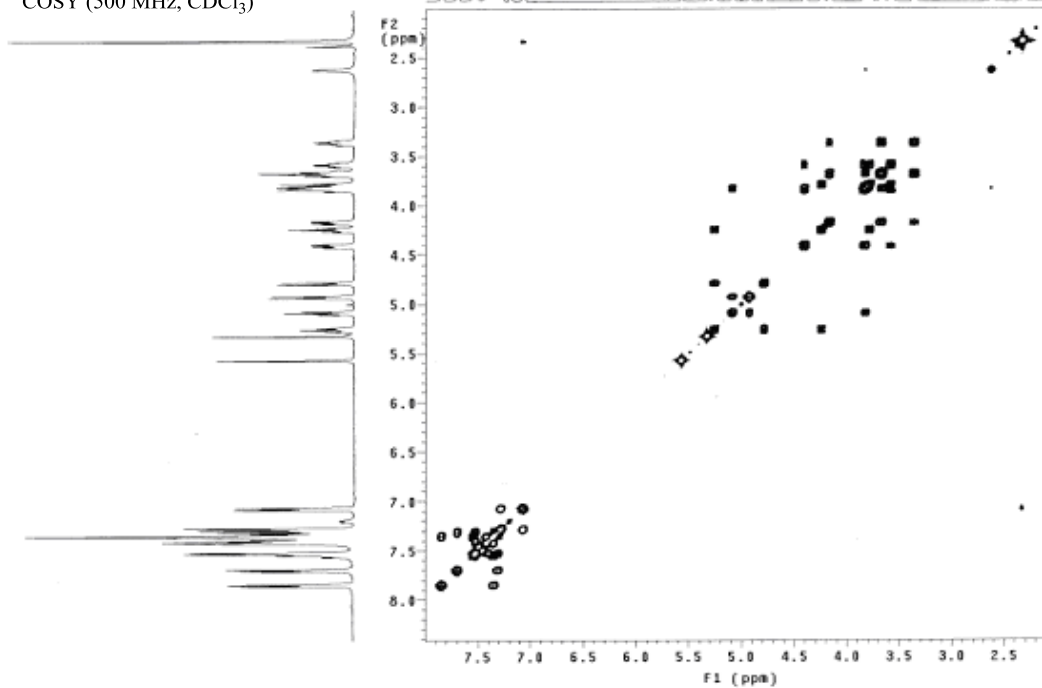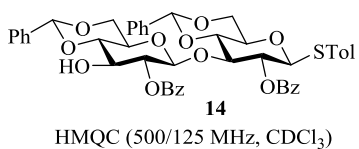

|    |        |        |       |
|----|--------|--------|-------|
| 10 | 8074.7 | 72.246 | 17.7  |
| 11 | 8885.1 | 78.787 | 23.9  |
| 12 | 8617.8 | 68.811 | -24.1 |
| 13 | 8614.6 | 68.585 | -31.8 |
| 14 | 8293.3 | 66.911 | 22.4  |

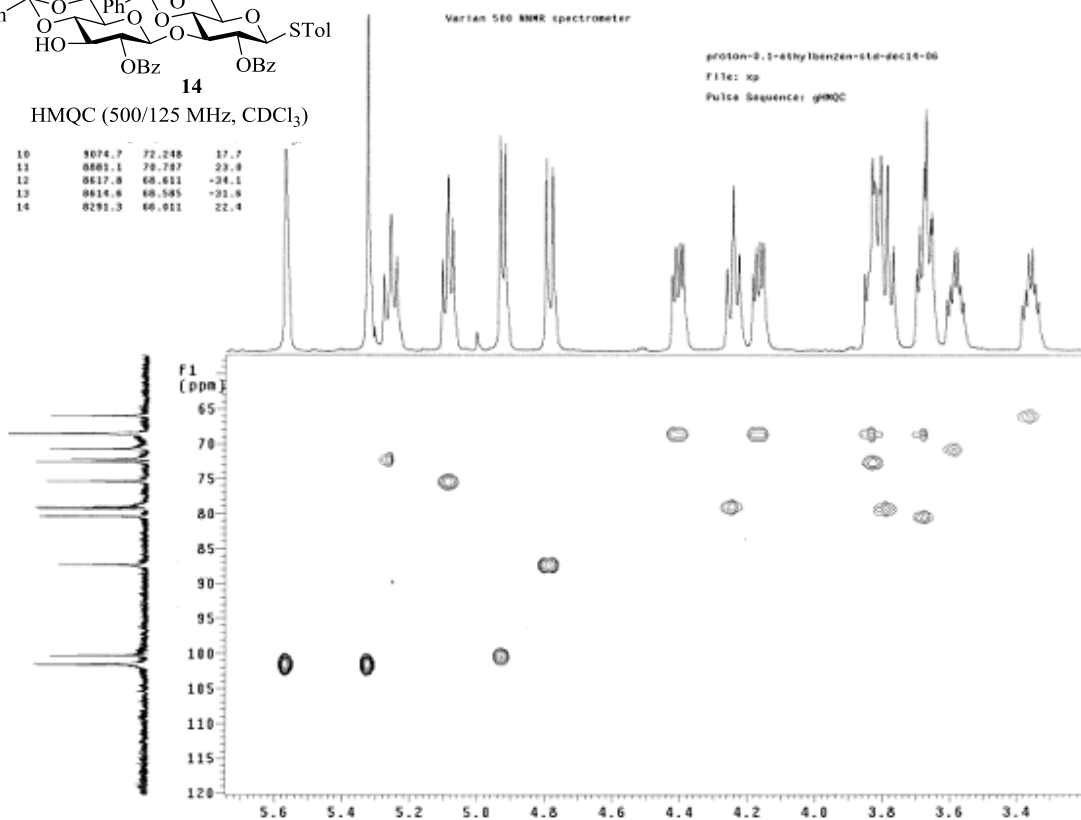

BSR-II-40-H1

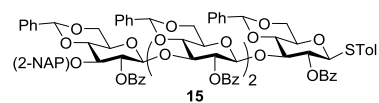<sup>1</sup>H-NMR (500 MHz, CDCl<sub>3</sub>)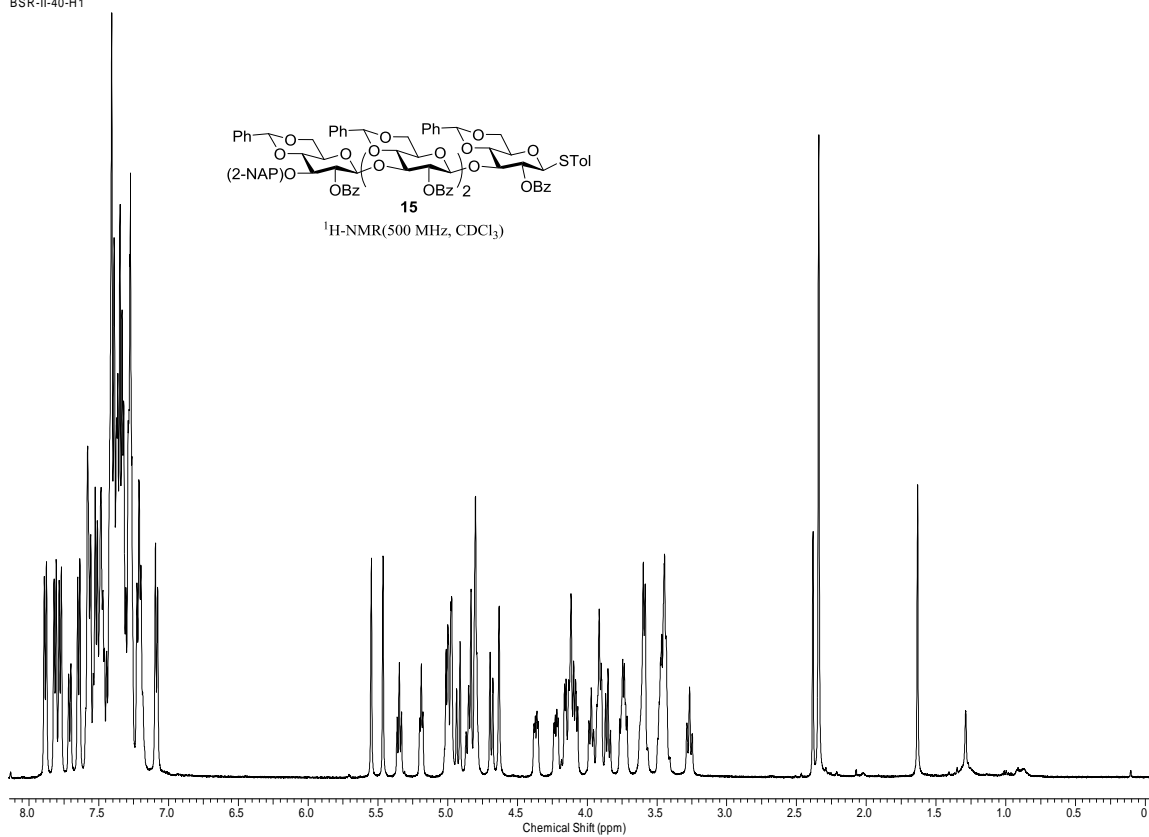

BSR-II-40-C13

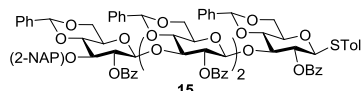<sup>13</sup>C-NMR (125 MHz, CDCl<sub>3</sub>)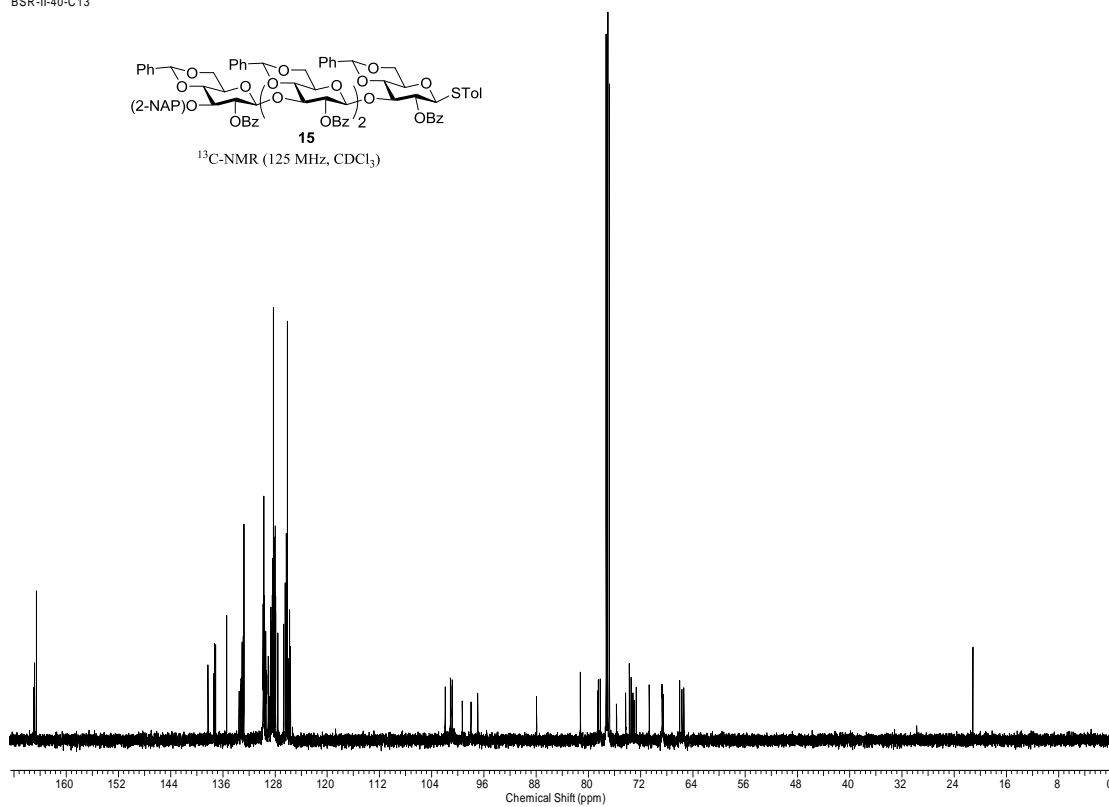

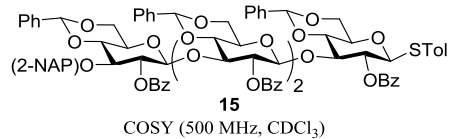COSY (500 MHz, CDCl<sub>3</sub>)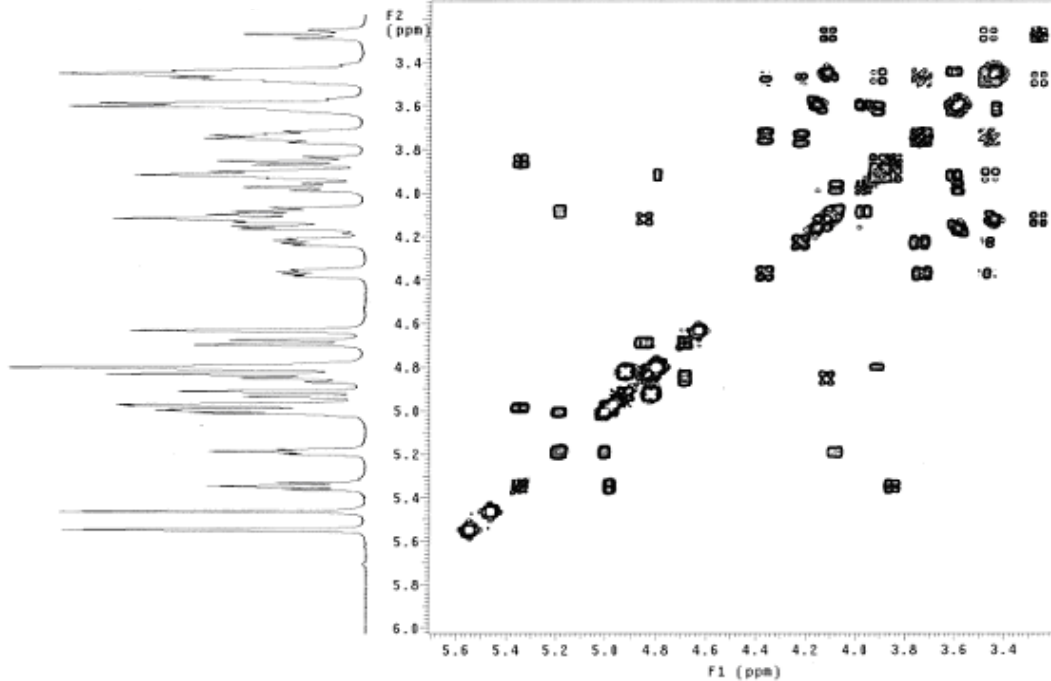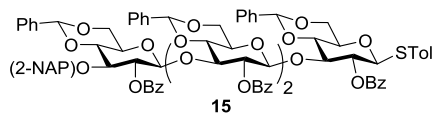HMQC (500/125 MHz, CDCl<sub>3</sub>)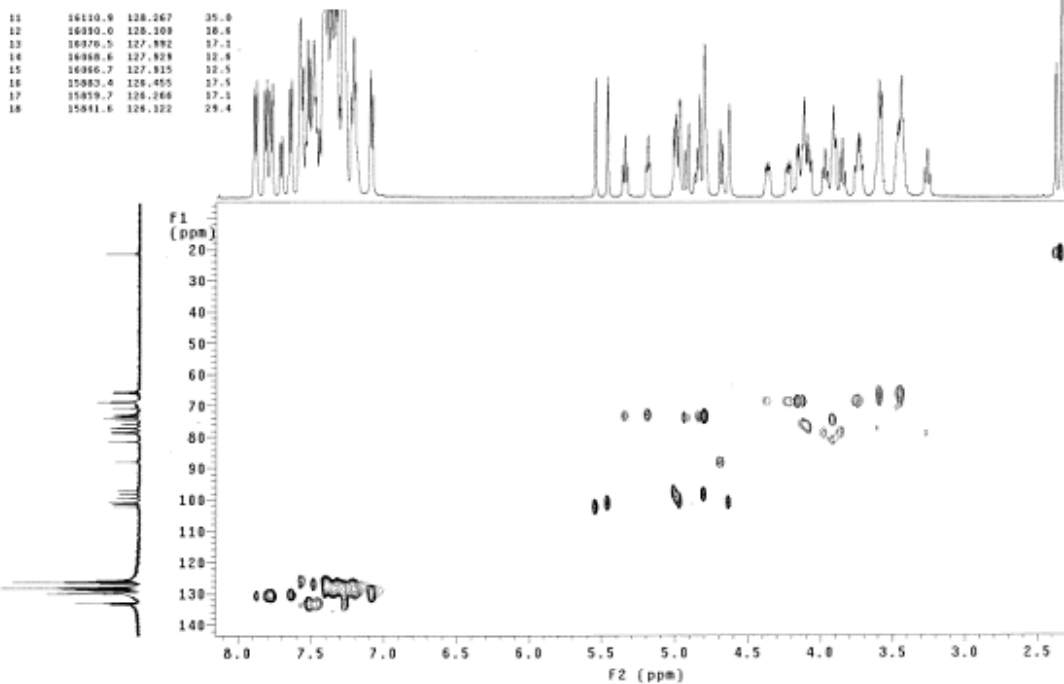

## S15

BSR-II-53-H1

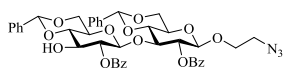**16** $^1\text{H-NMR}$ (400 MHz,  $\text{CDCl}_3$ )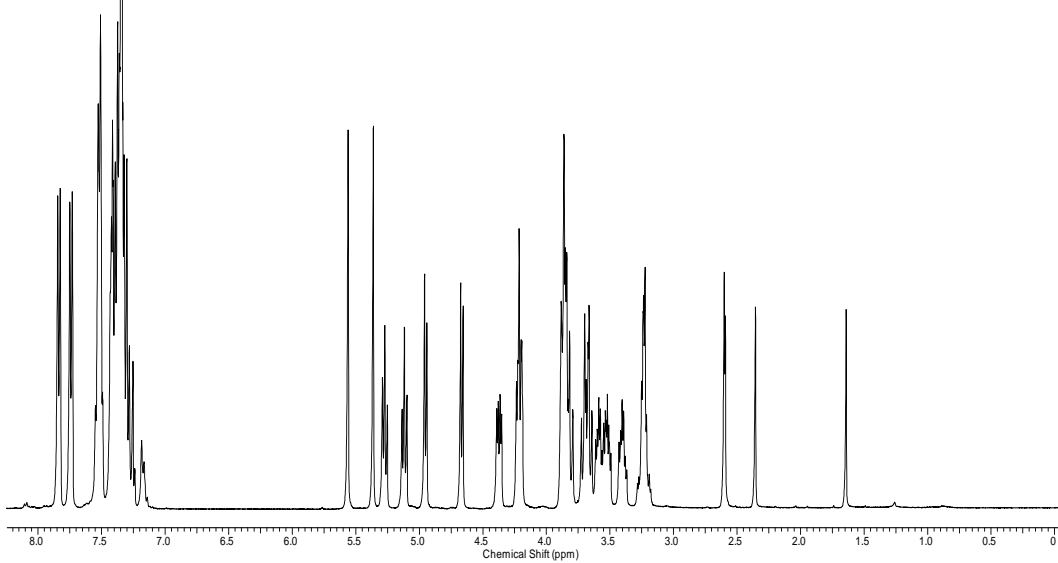

BSR-II-53-C13

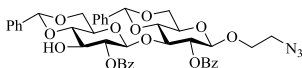**16** $^{13}\text{C-NMR}$  (100 MHz,  $\text{CDCl}_3$ )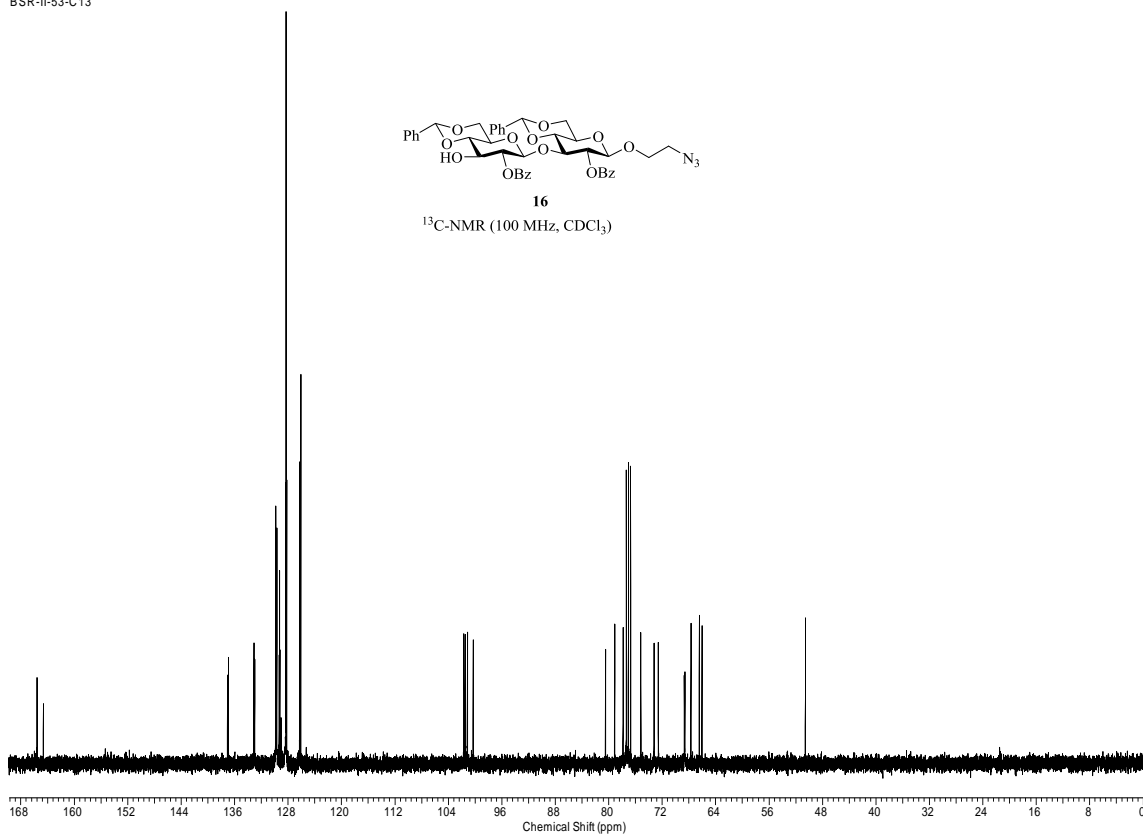

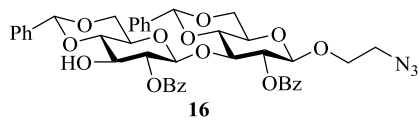COSY (400 MHz, CDCl<sub>3</sub>)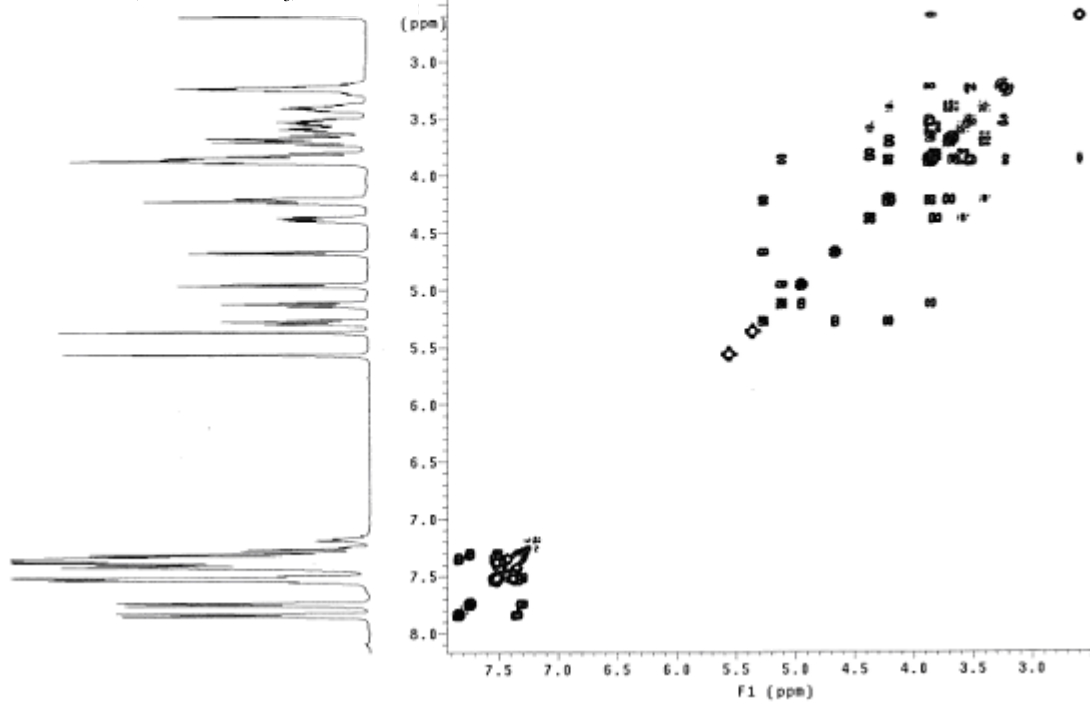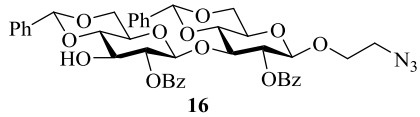HMQC (400/100 MHz, CDCl<sub>3</sub>)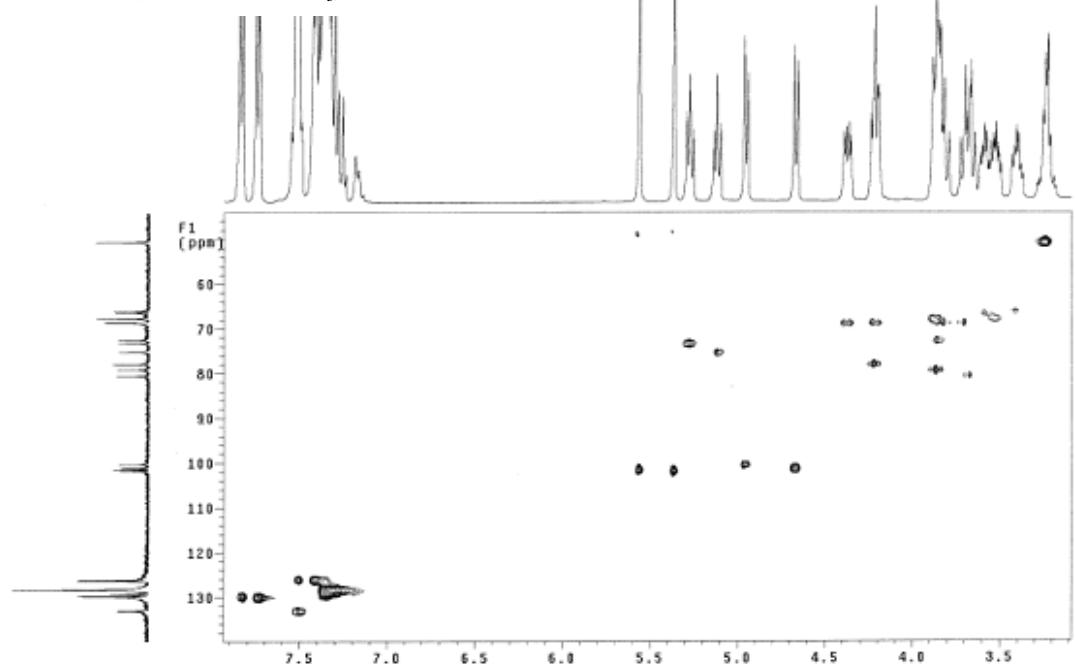



## S17

BSR-II-55-H1

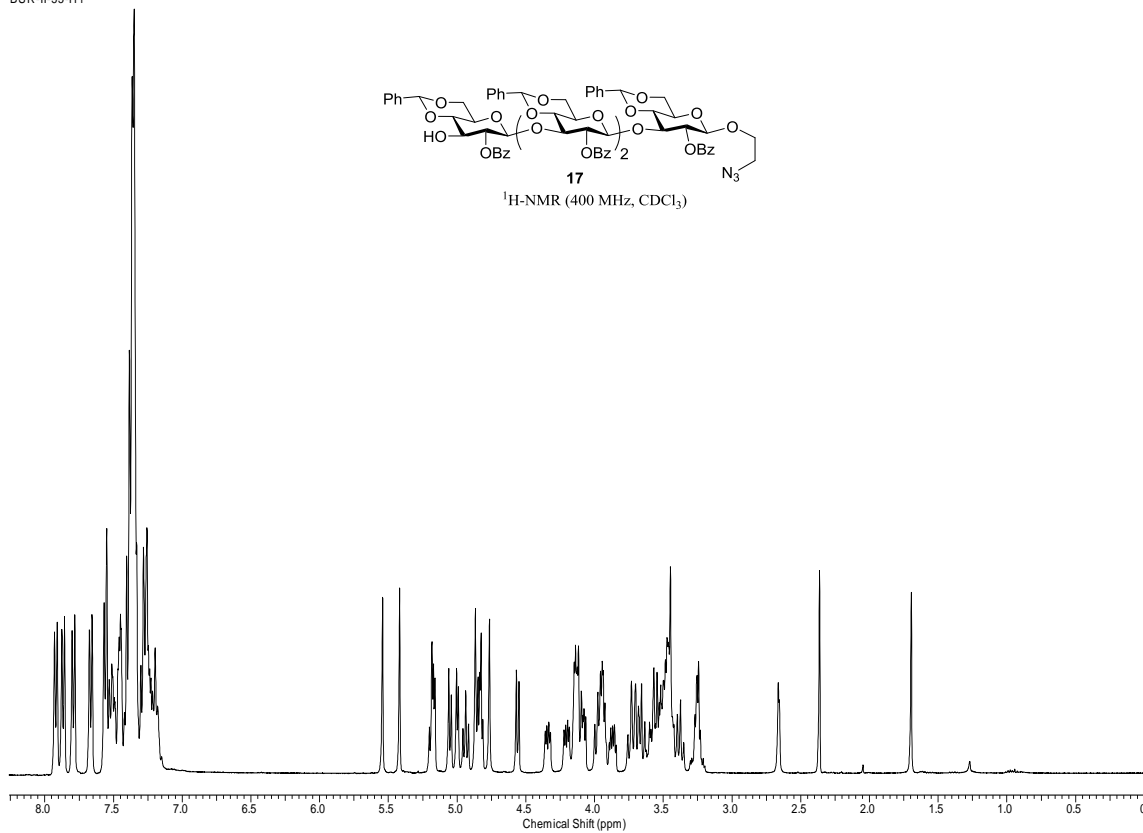

BSR-II-55-C13-H1

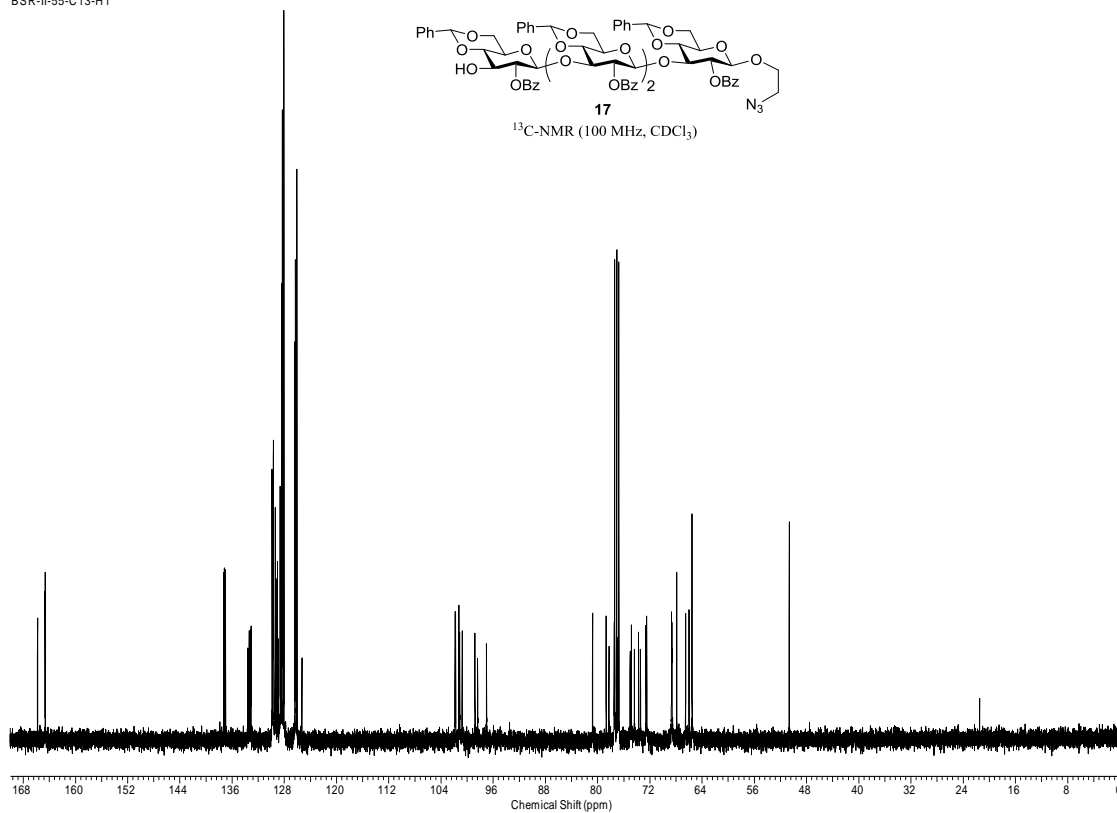

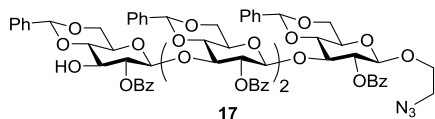COSY (400 MHz, CDCl<sub>3</sub>)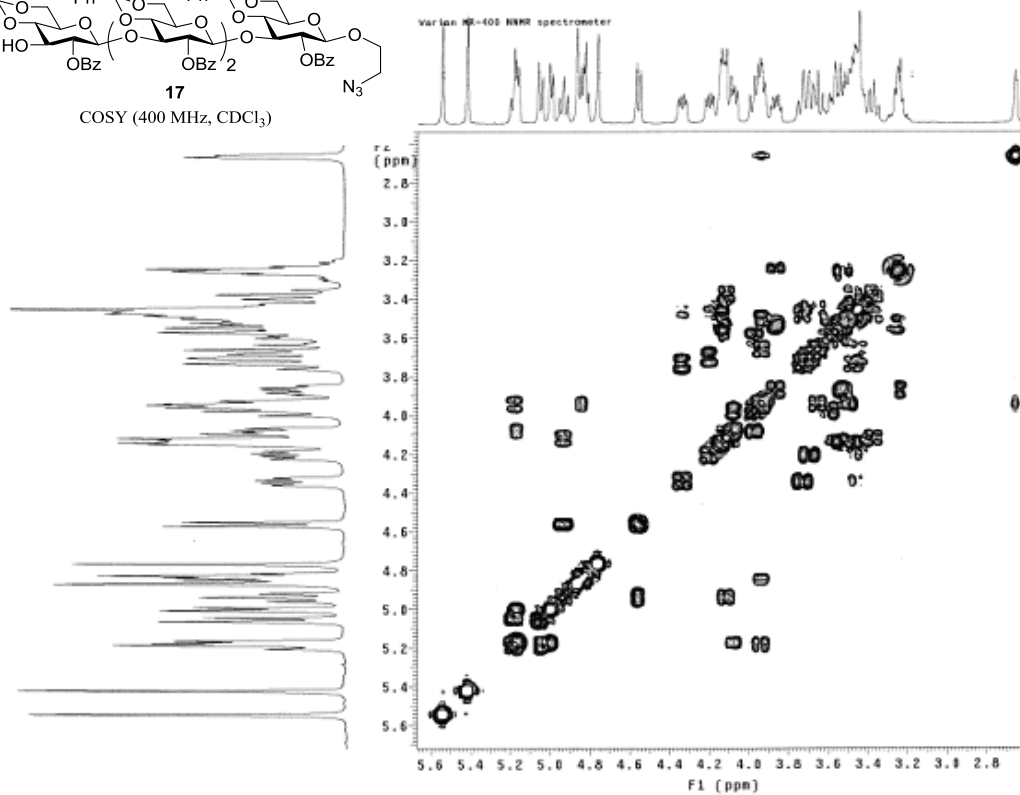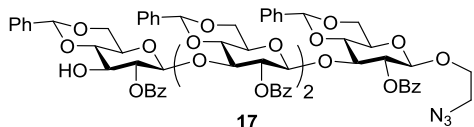HMOC (400/100 MHz, CDCl<sub>3</sub>)

|    |         |         |       |
|----|---------|---------|-------|
| 11 | 12702.5 | 126.390 | 17.6  |
| 12 | 12695.7 | 126.329 | 25.7  |
| 13 | 12672.0 | 126.085 | 17.6  |
| 14 | 8503.4  | 68.889  | -15.2 |
| 15 | 6588.5  | 65.555  | 12.3  |

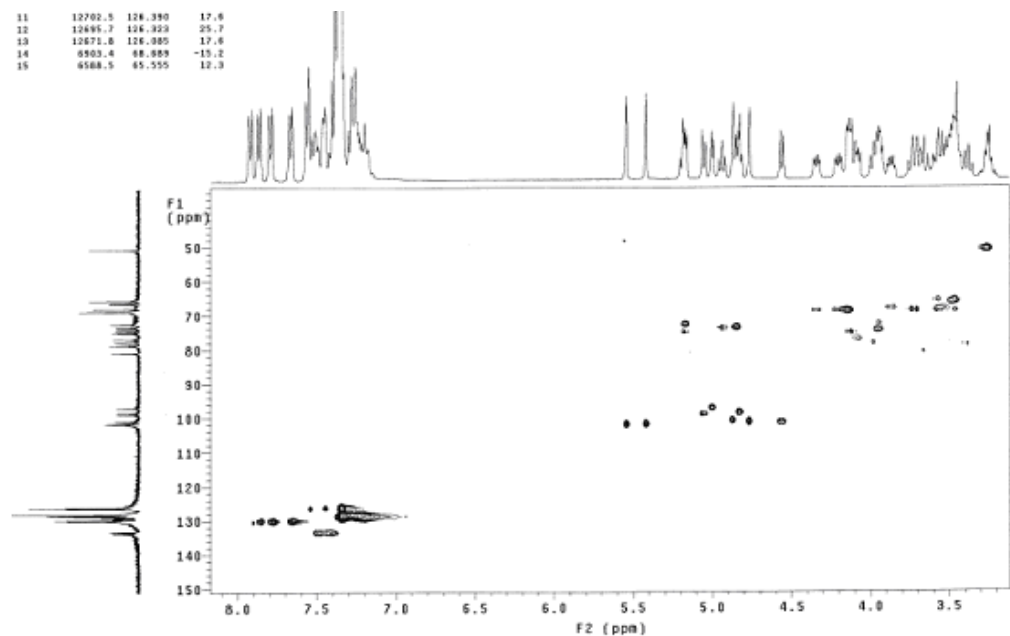



Sample Name:  
 Data Collected on:  
 a600-vmr600  
 Archive directory:  
 /home/vmr1/vmrays/probes/probe\_calibs  
 Sample directory:  
 FidFile: COSY  
 Pulse Sequence: COSY  
 Solvent: cdcl3  
 Data collected on: Sep 7 2014

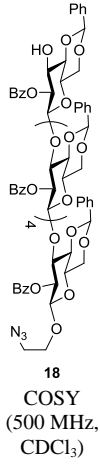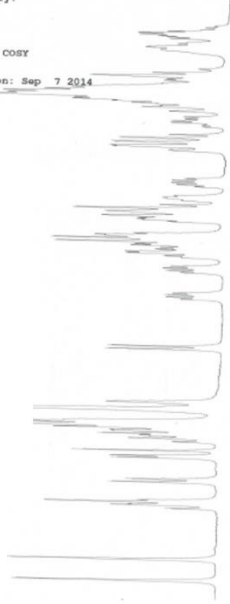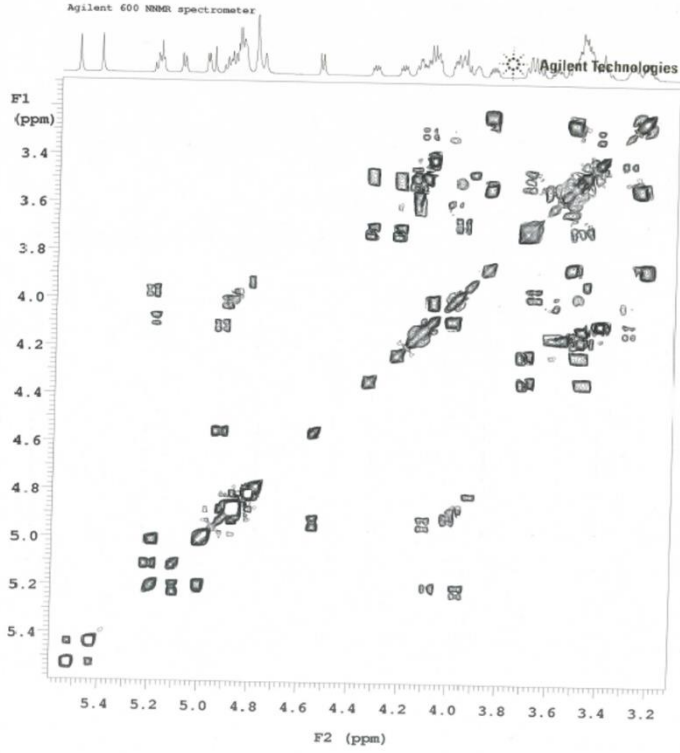

|    |         |         |       |
|----|---------|---------|-------|
| 1  | 15372.3 | 101.930 | 19.2  |
| 2  | 15348.2 | 101.770 | 20.5  |
| 3  | 15276.9 | 101.298 | 14.3  |
| 4  | 15269.7 | 101.250 | 23.7  |
| 5  | 15264.6 | 101.216 | 22.3  |
| 6  | 15181.6 | 100.666 | 18.3  |
| 7  | 14845.6 | 98.438  | 14.5  |
| 8  | 14639.9 | 98.400  | 14.3  |
| 9  | 14644.2 | 97.102  | 15.1  |
| 10 | 14607.1 | 96.857  | 15.5  |
| 11 | 12191.0 | 80.836  | 19.7  |
| 12 | 11870.6 | 78.712  | 16.4  |
| 13 | 11776.4 | 78.087  | 13.3  |
| 14 | 11752.3 | 77.927  | 14.0  |
| 15 | 11745.5 | 77.882  | 15.8  |
| 16 | 11690.6 | 77.518  | 14.5  |
| 17 | 11554.8 | 76.617  | 13.8  |
| 18 | 11277.7 | 74.780  | 19.4  |
| 19 | 11196.3 | 74.240  | 24.5  |
| 20 | 11120.6 | 73.738  | 16.0  |
| 21 | 11075.7 | 73.441  | 16.1  |
| 22 | 11034.2 | 73.165  | 13.3  |
| 23 | 11000.6 | 72.942  | 13.2  |
| 24 | 10938.3 | 72.529  | 20.2  |
| 25 | 10925.4 | 72.444  | 20.0  |
| 26 | 10361.6 | 68.705  | -22.5 |
| 27 | 10346.5 | 68.671  | -34.6 |
| 28 | 10244.4 | 67.925  | -25.8 |
| 29 | 10025.6 | 66.411  | 18.3  |
| 30 | 9957.7  | 66.027  | 19.5  |
| 31 | 9886.4  | 65.555  | 21.7  |
| 32 | 9861.4  | 65.521  | 22.0  |
| 33 | 9875.8  | 65.484  | 20.7  |
| 34 | 7638.0  | 50.646  | -27.8 |

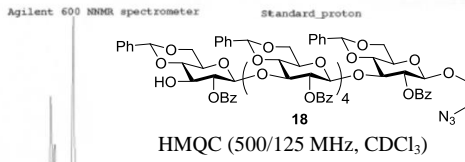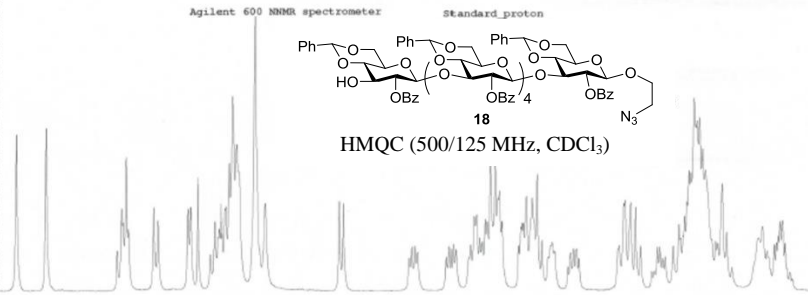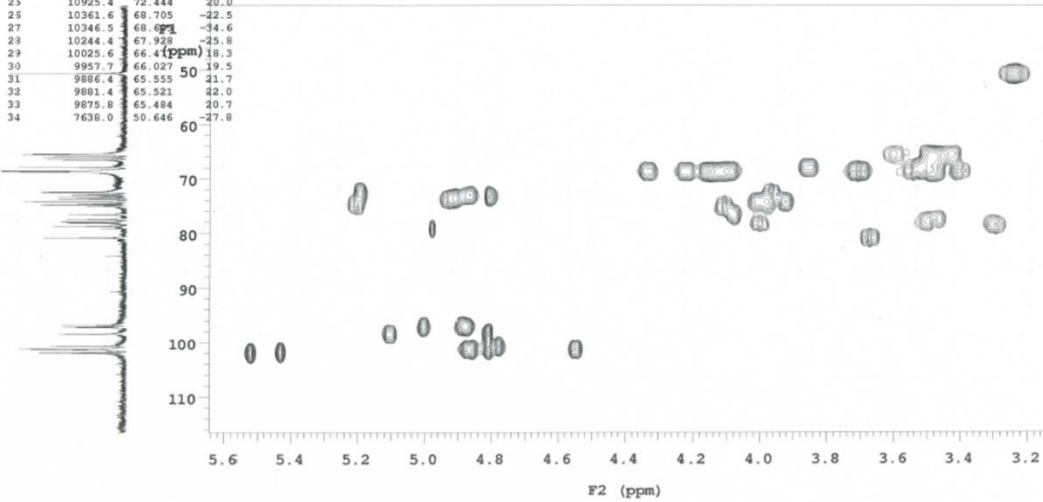

BSR-II-58-1H3

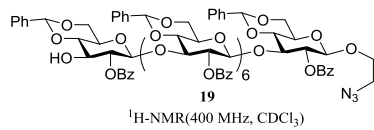<sup>1</sup>H-NMR(400 MHz, CDCl<sub>3</sub>)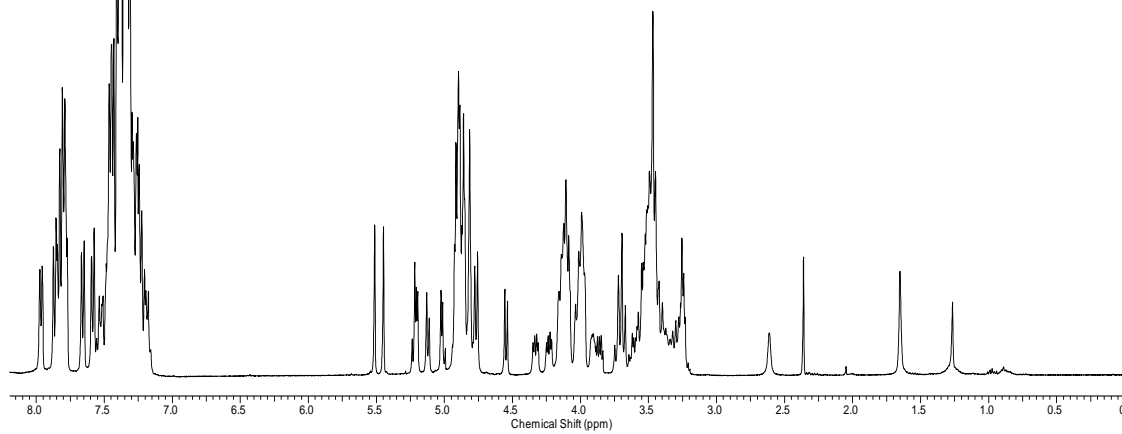

BSR-II-58-C13

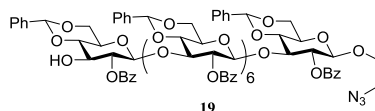<sup>13</sup>C-NMR (100 MHz, CDCl<sub>3</sub>)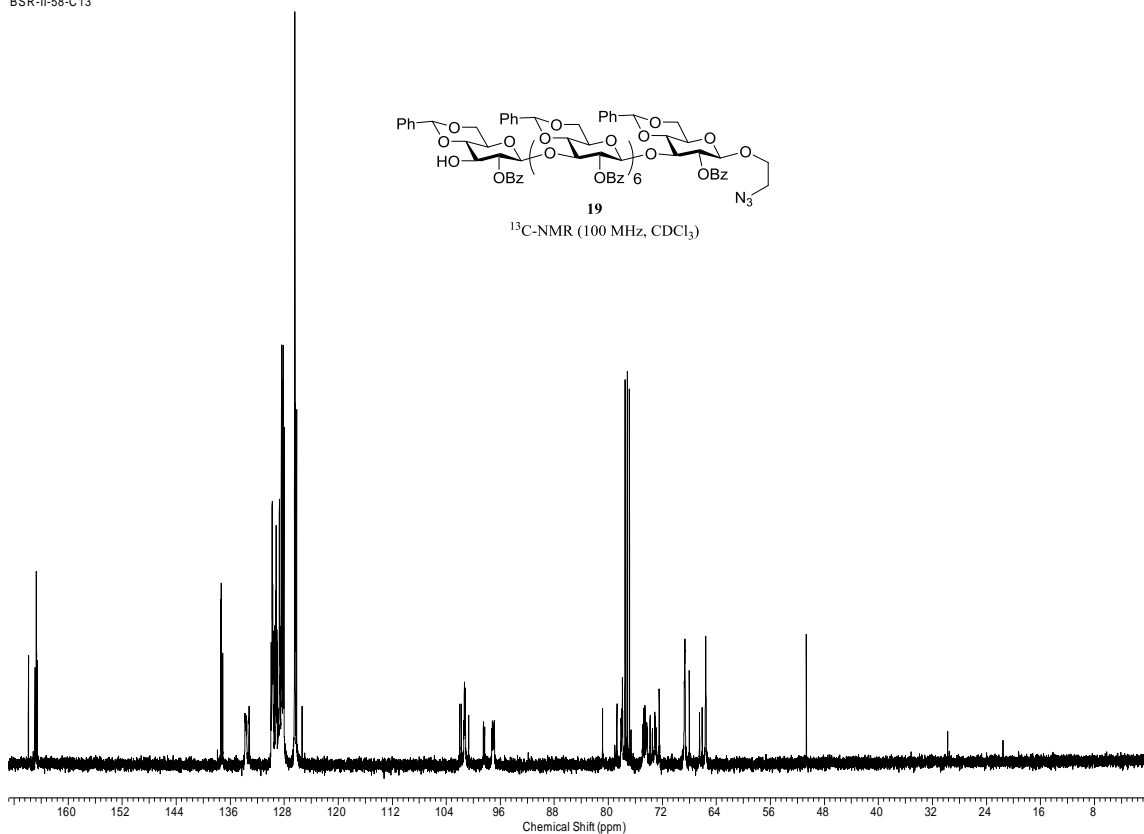

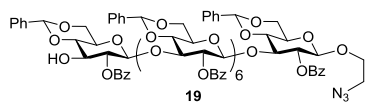COSY (400 MHz, CDCl<sub>3</sub>)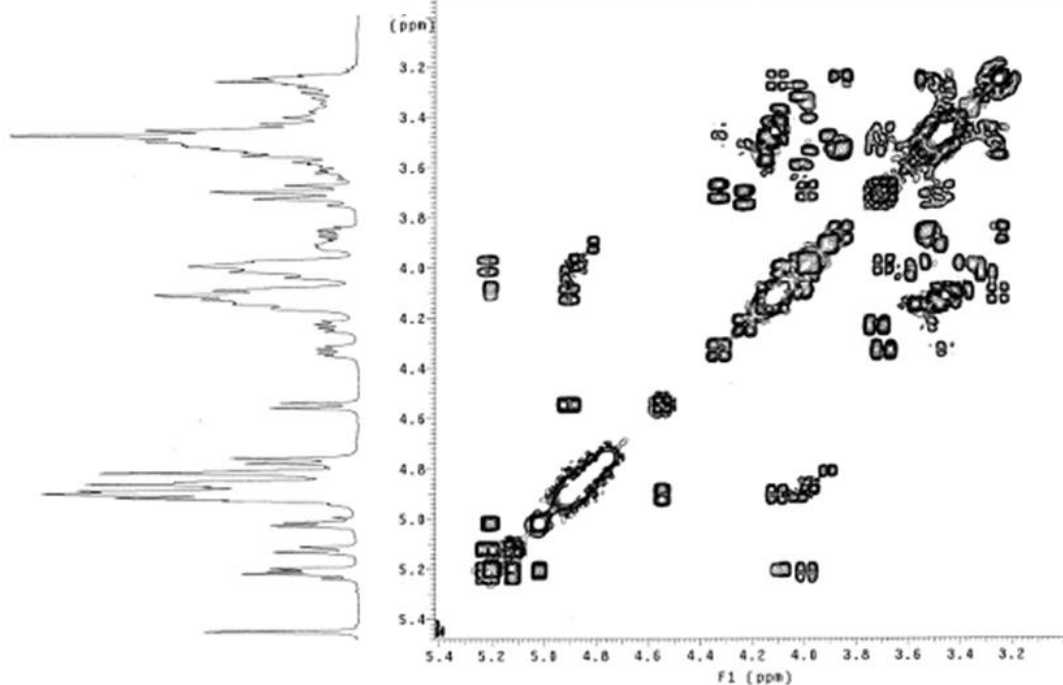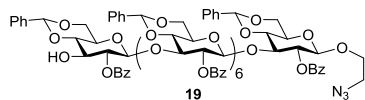HMQC (400/100 MHz, CDCl<sub>3</sub>)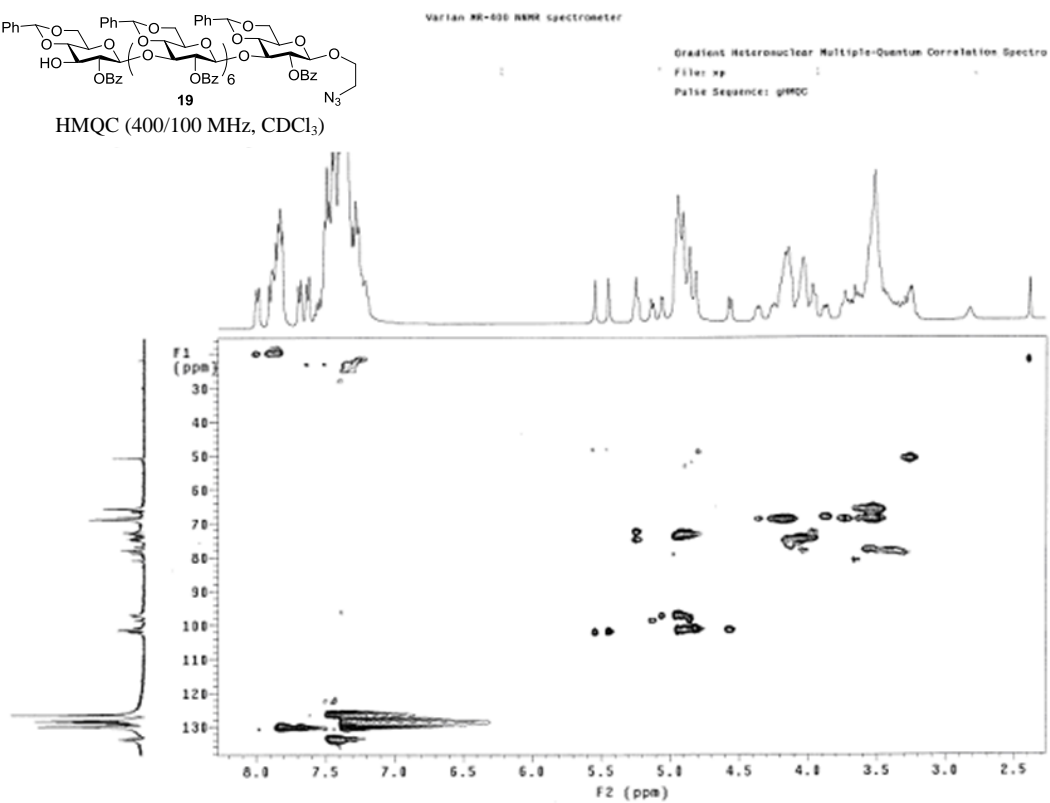

BSR-II-63-2H1

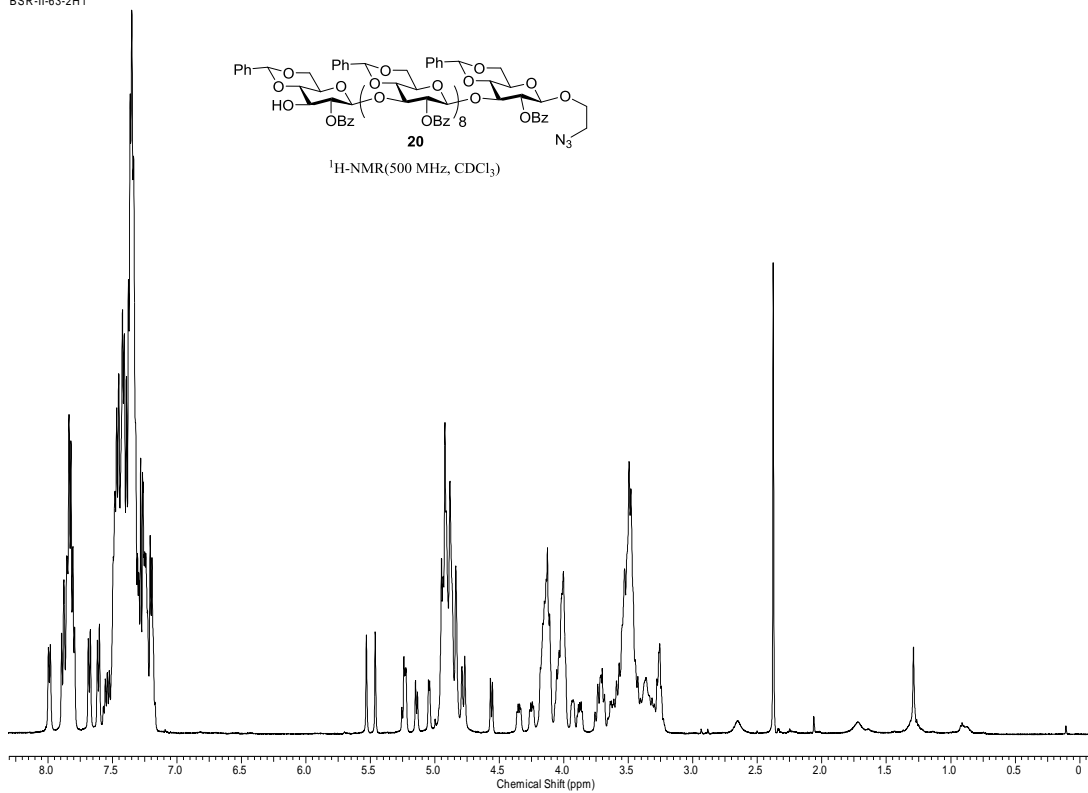

BSR-II-63-2C13

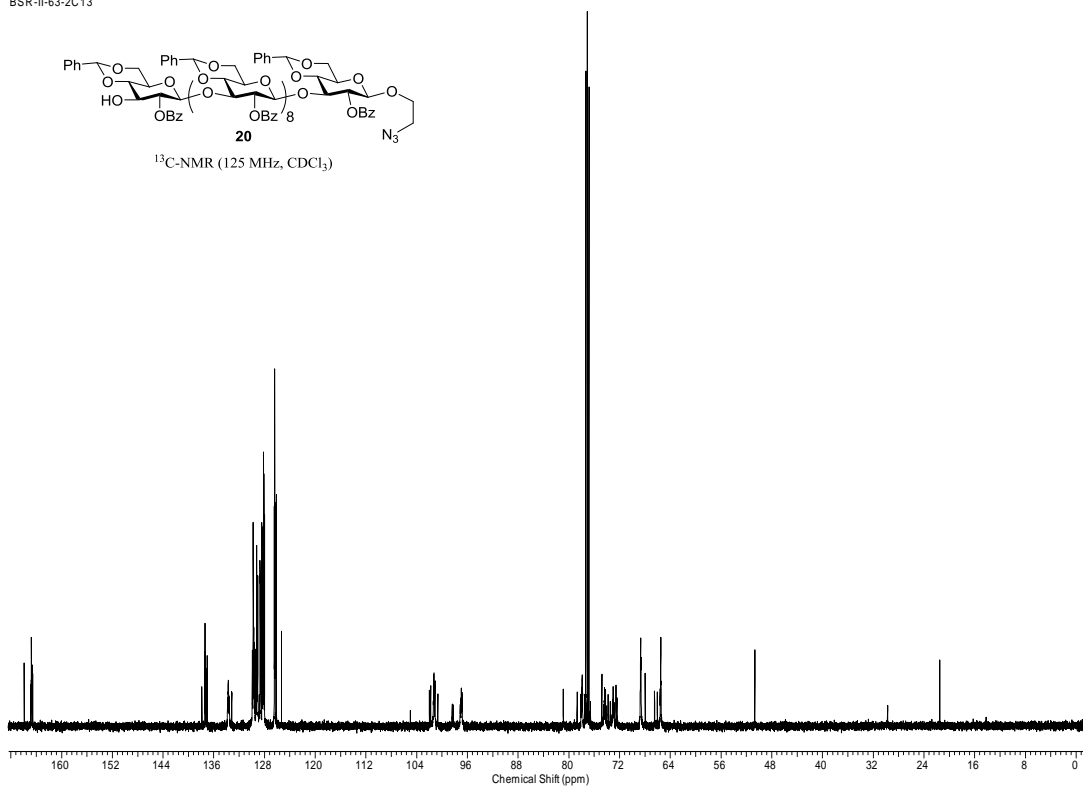

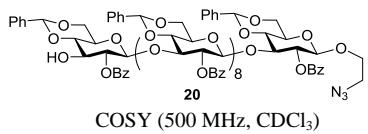

COSY (500 MHz, CDCl<sub>3</sub>)

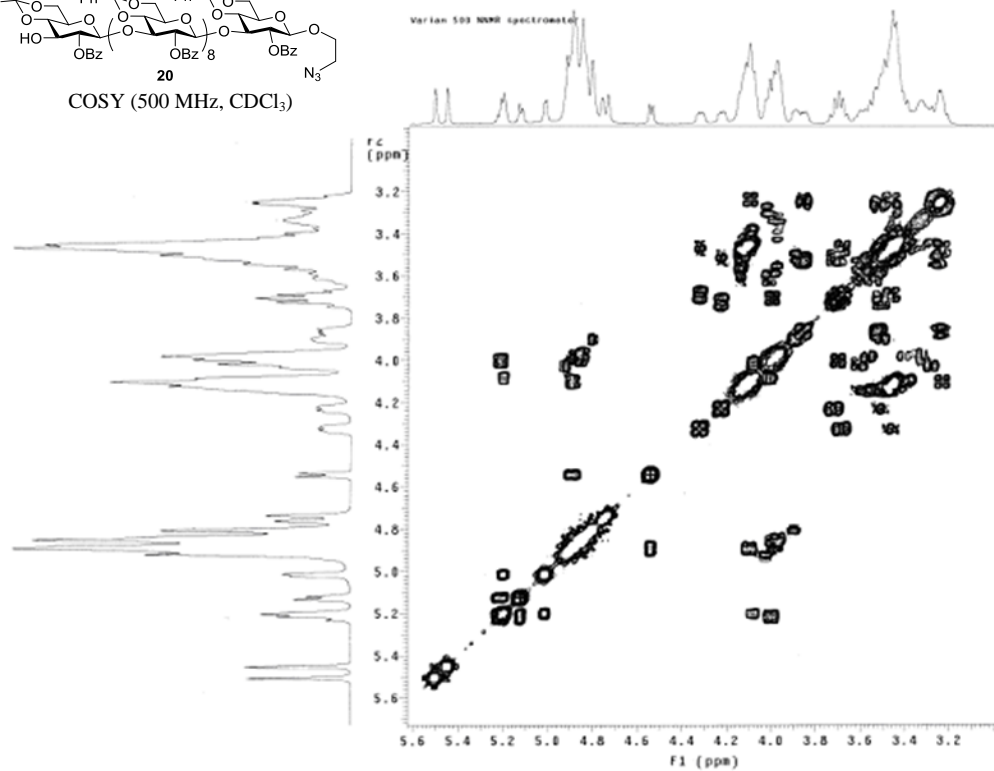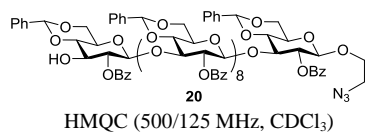

HMQC (500/125 MHz, CDCl<sub>3</sub>)

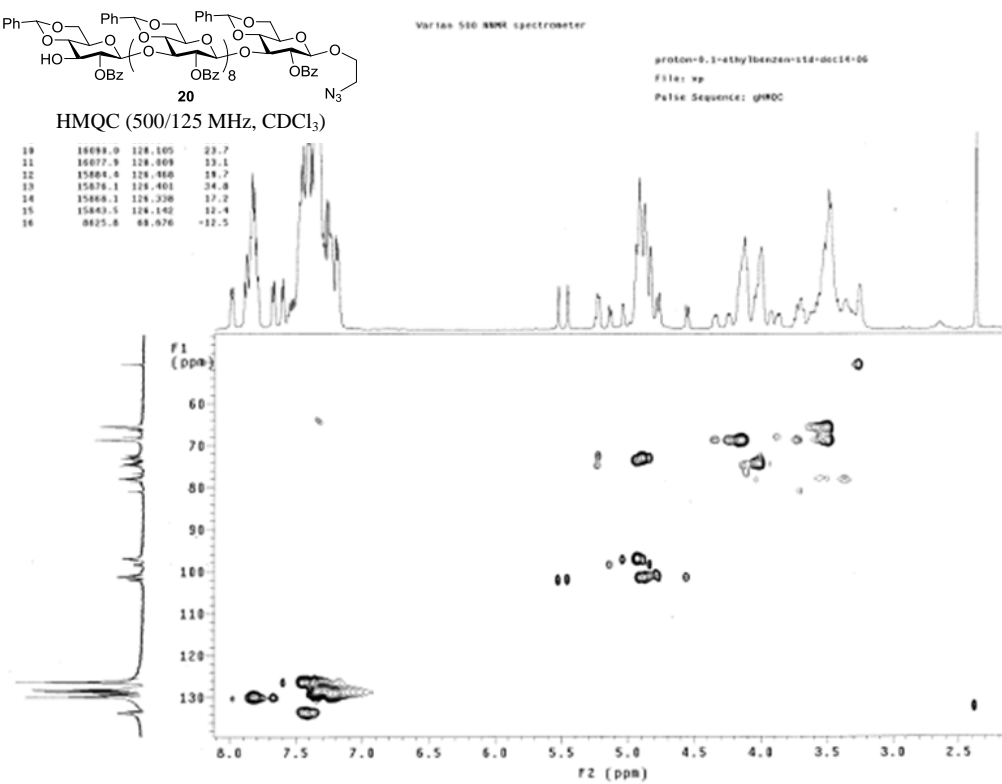



BSR-II-61-A-H1

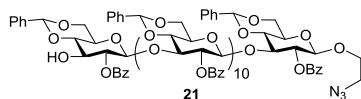<sup>1</sup>H-NMR (500 MHz, CDCl<sub>3</sub>)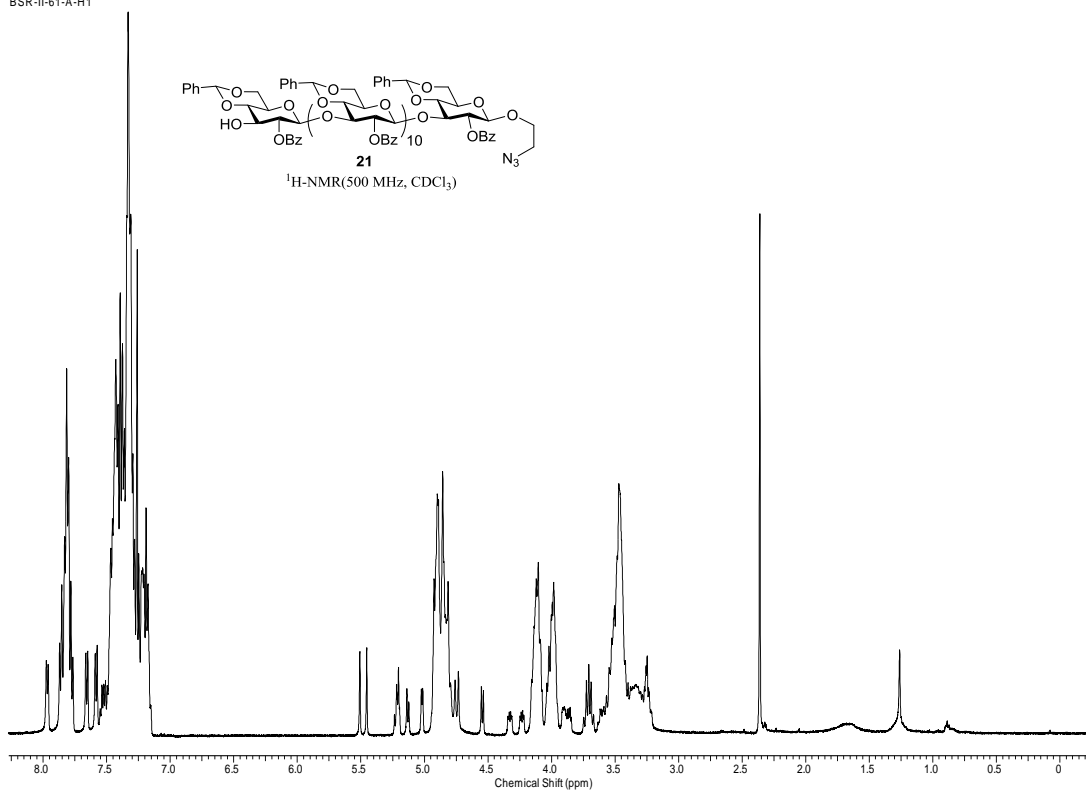

BSR-II-61-A-C13

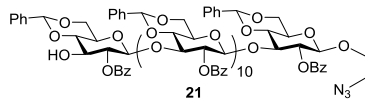<sup>13</sup>C-NMR (125 MHz, CDCl<sub>3</sub>)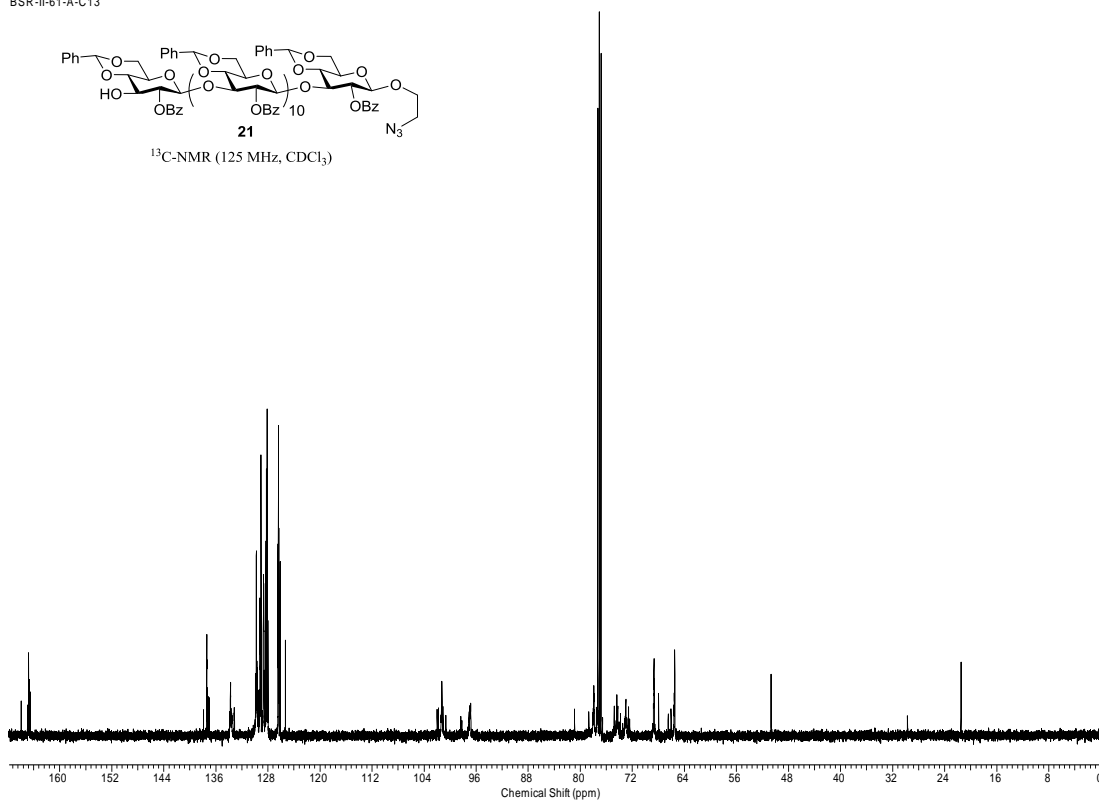

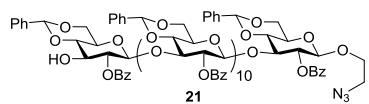COSY (500 MHz, CDCl<sub>3</sub>)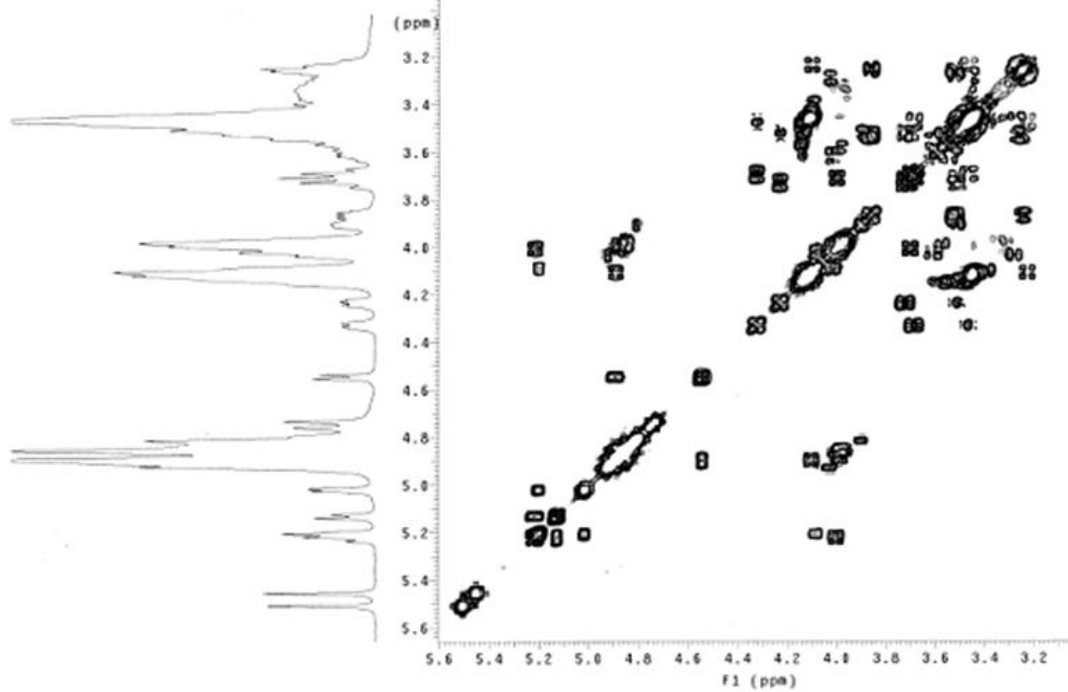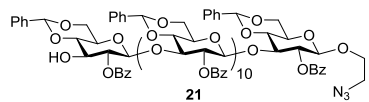HMQC (500/125 MHz, CDCl<sub>3</sub>)

|    |         |         |      |
|----|---------|---------|------|
| 10 | 15876.5 | 326.485 | 34.9 |
| 11 | 15866.7 | 329.327 | 12.4 |

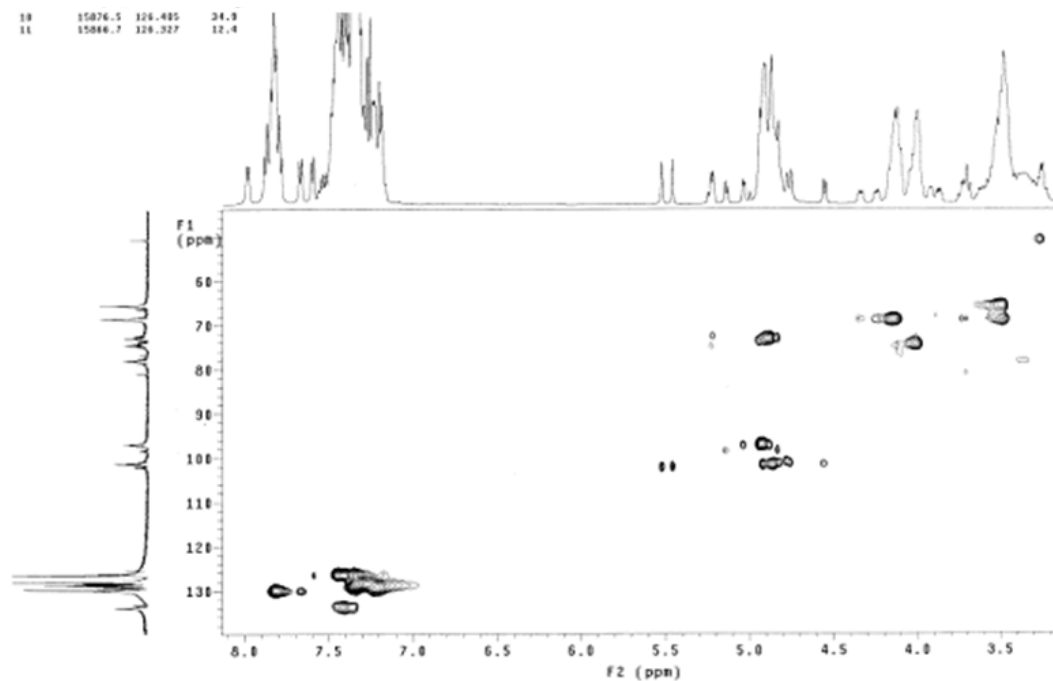

Varian 500 NMR spectrometer

proton-0.1-ethylbenzen-std-dec10-06  
 file: xp  
 Pulse Sequence: ghmoc



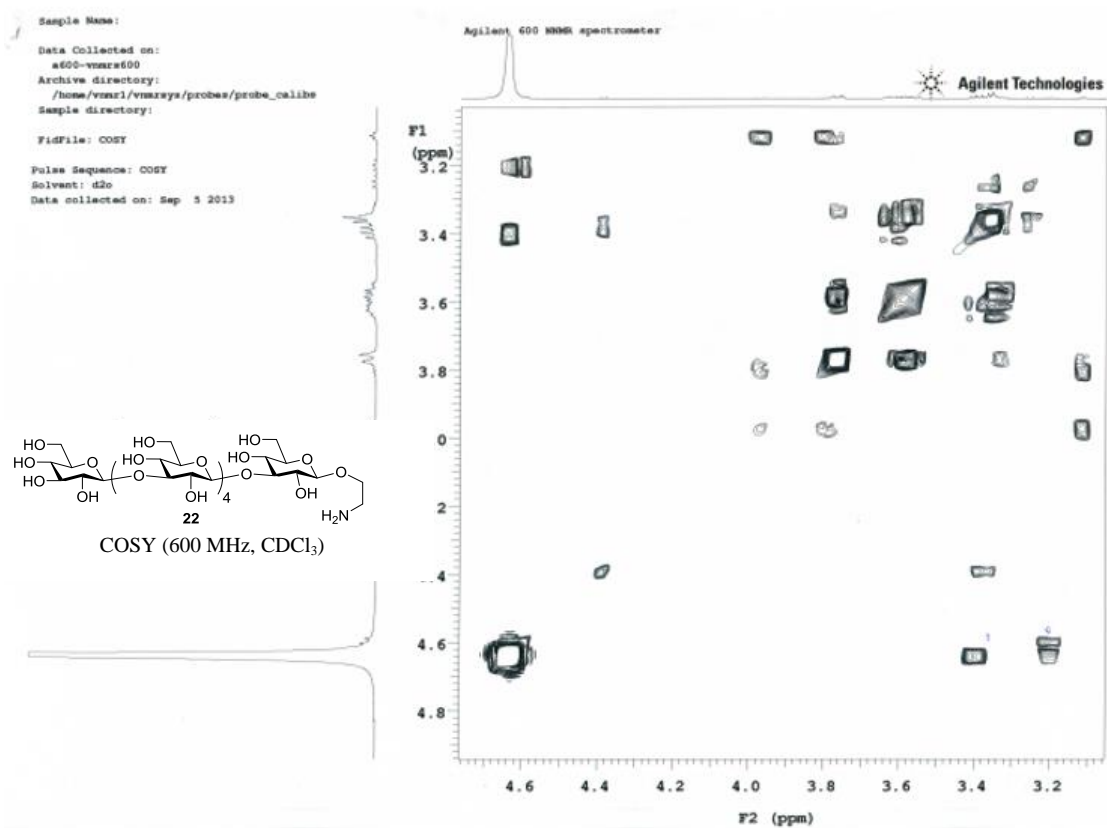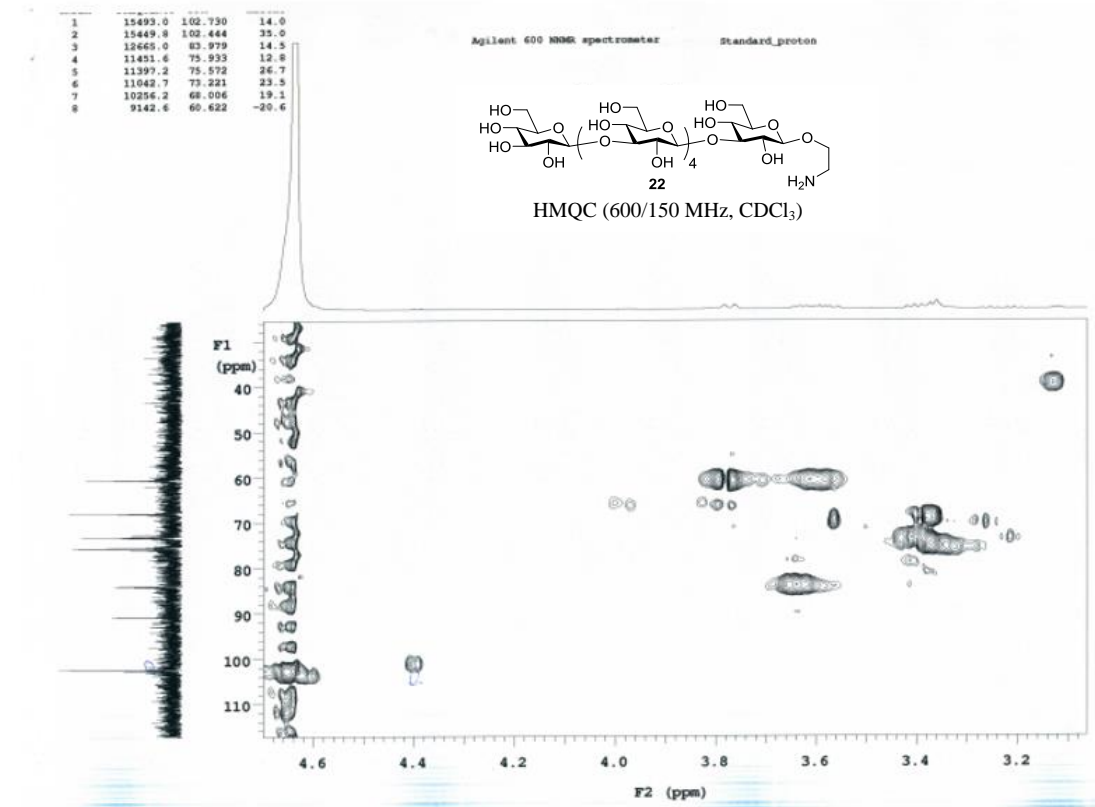

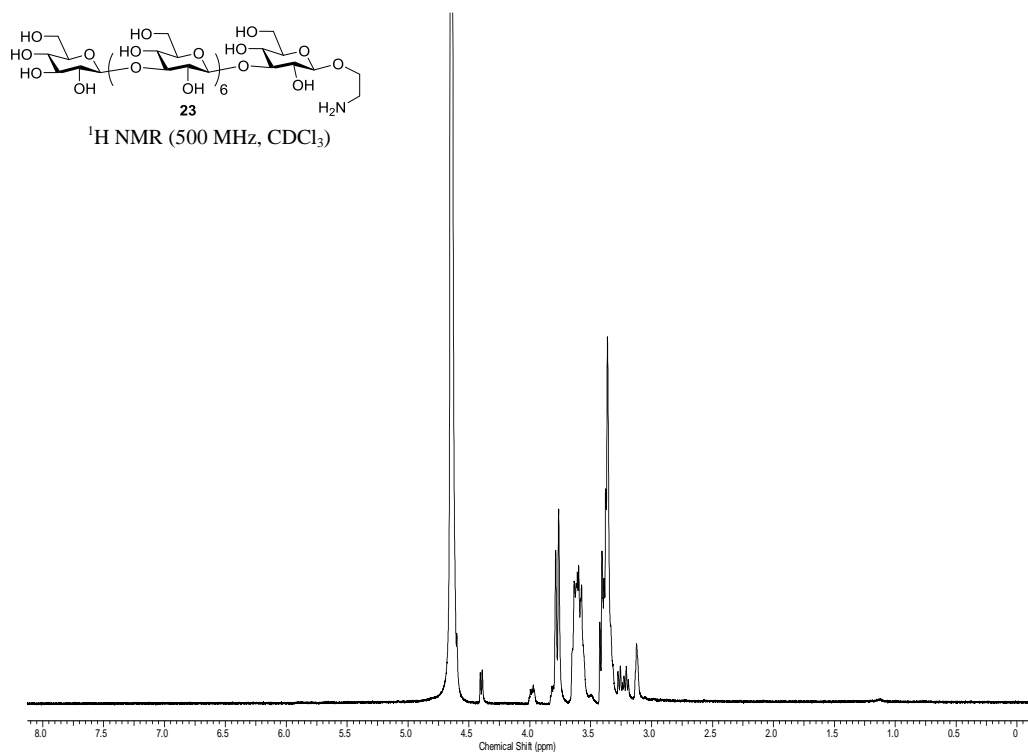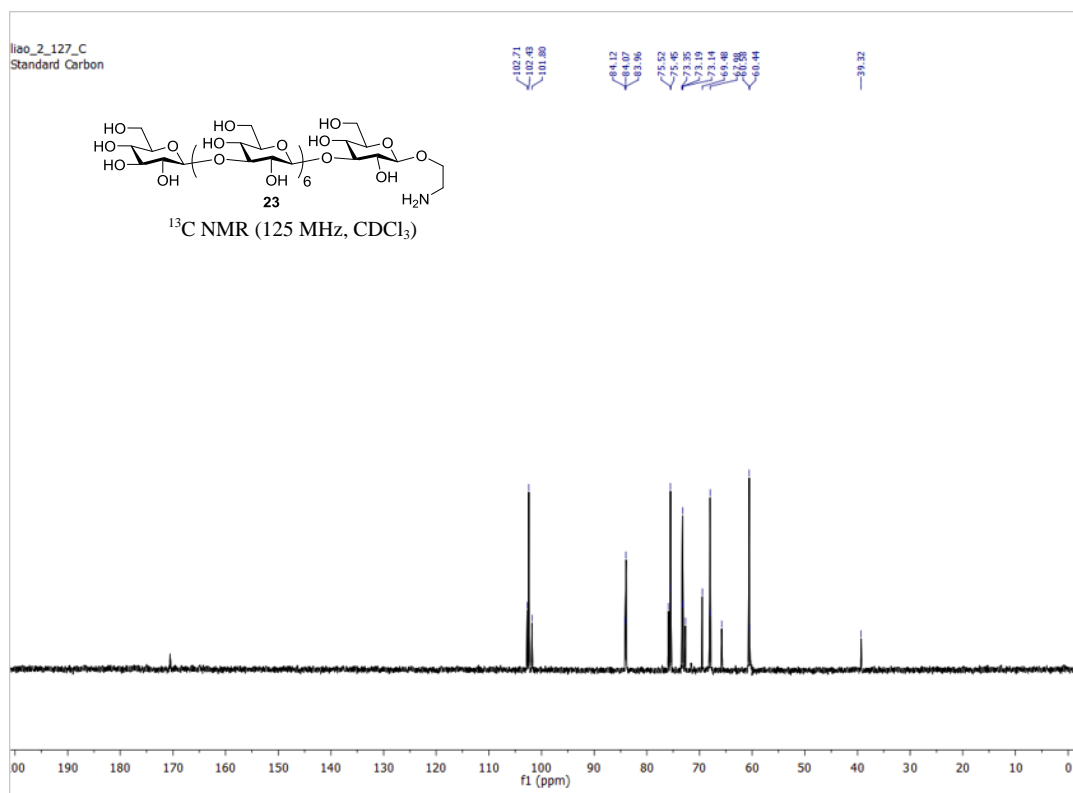

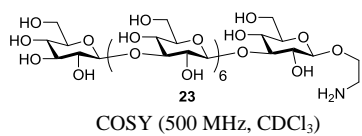COSY (500 MHz, CDCl<sub>3</sub>)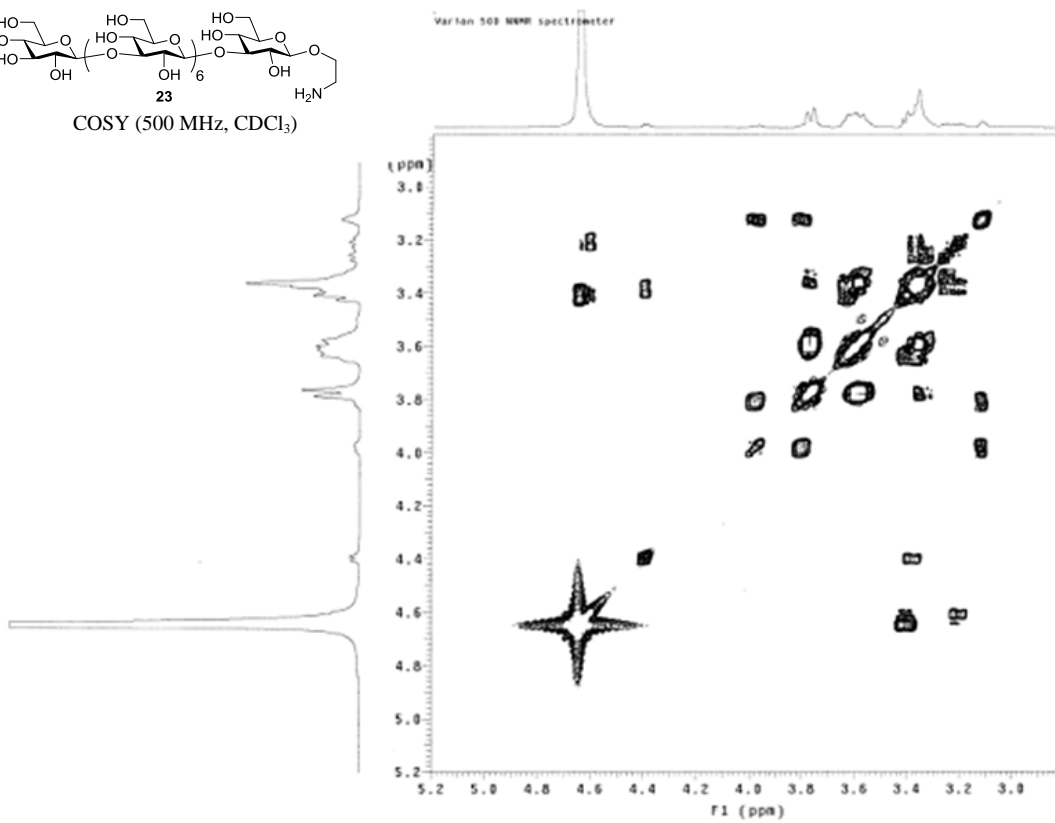

BSR-II-124-H1

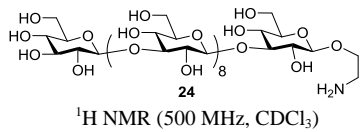<sup>1</sup>H NMR (500 MHz, CDCl<sub>3</sub>)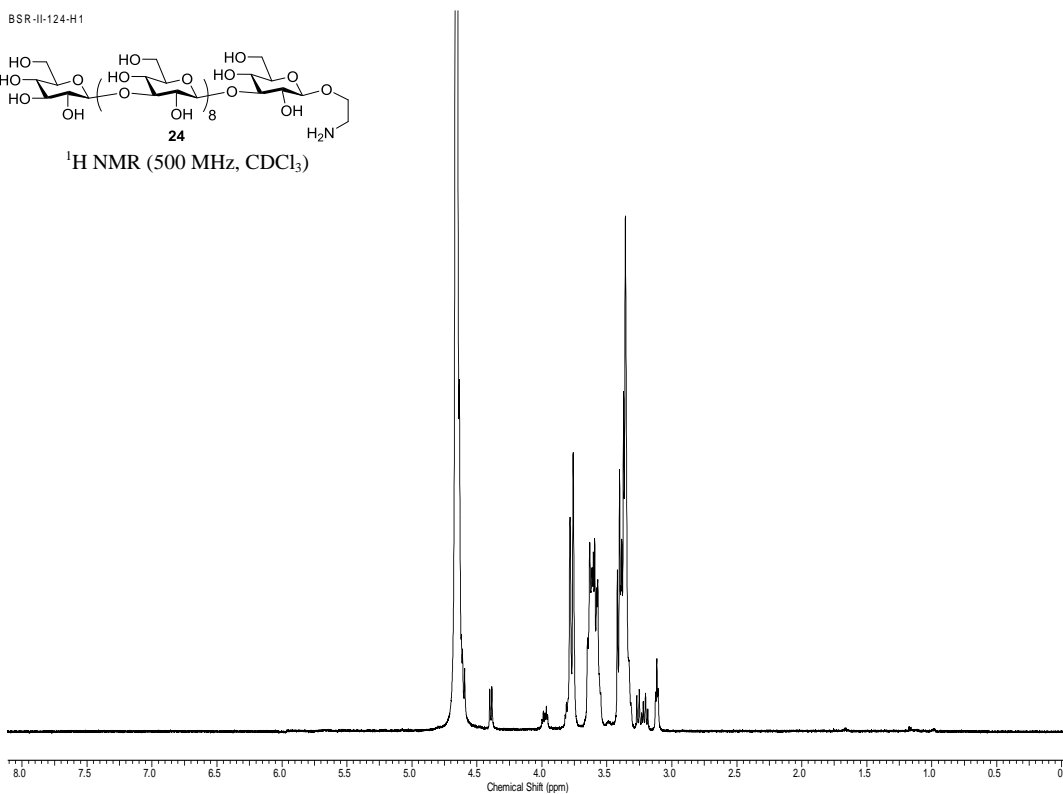

liao\_2\_124\_C  
Standard Carbon

102.73  
102.45  
101.82  
84.13  
84.01  
75.55  
73.38  
72.52  
71.64  
69.50  
69.37  
68.82  
60.30  
60.03  
39.36

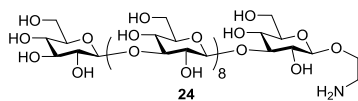

$^{13}\text{C}$  NMR (125 MHz,  $\text{CDCl}_3$ )

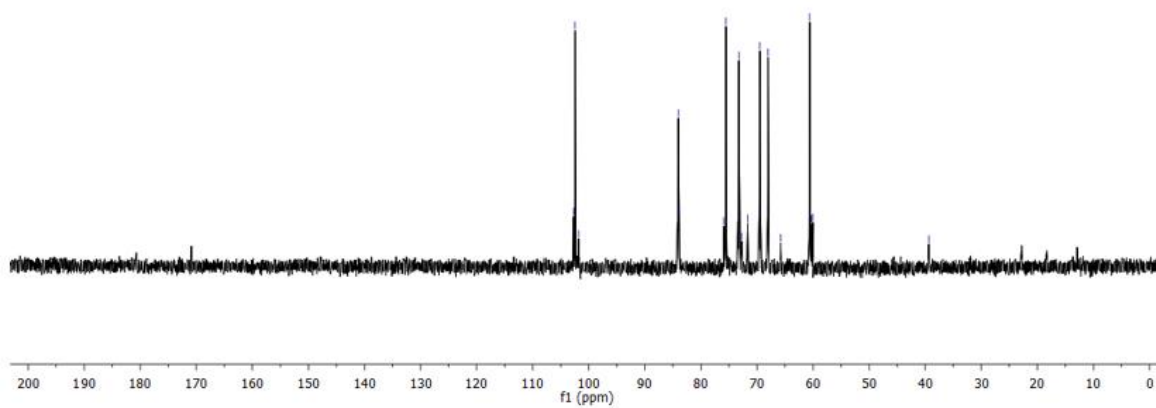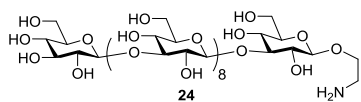

COSY (500 MHz,  $\text{CDCl}_3$ )

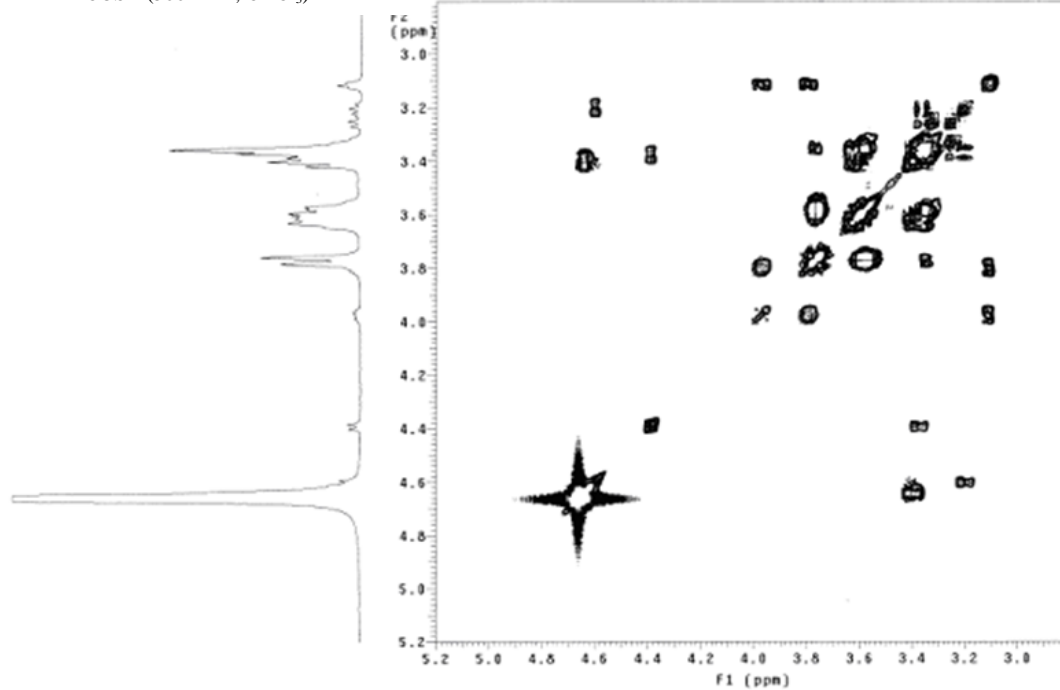

BSR-II-118-H1

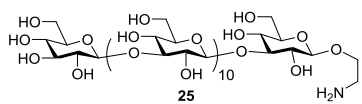 $^1\text{H NMR}$  (500 MHz,  $\text{CDCl}_3$ )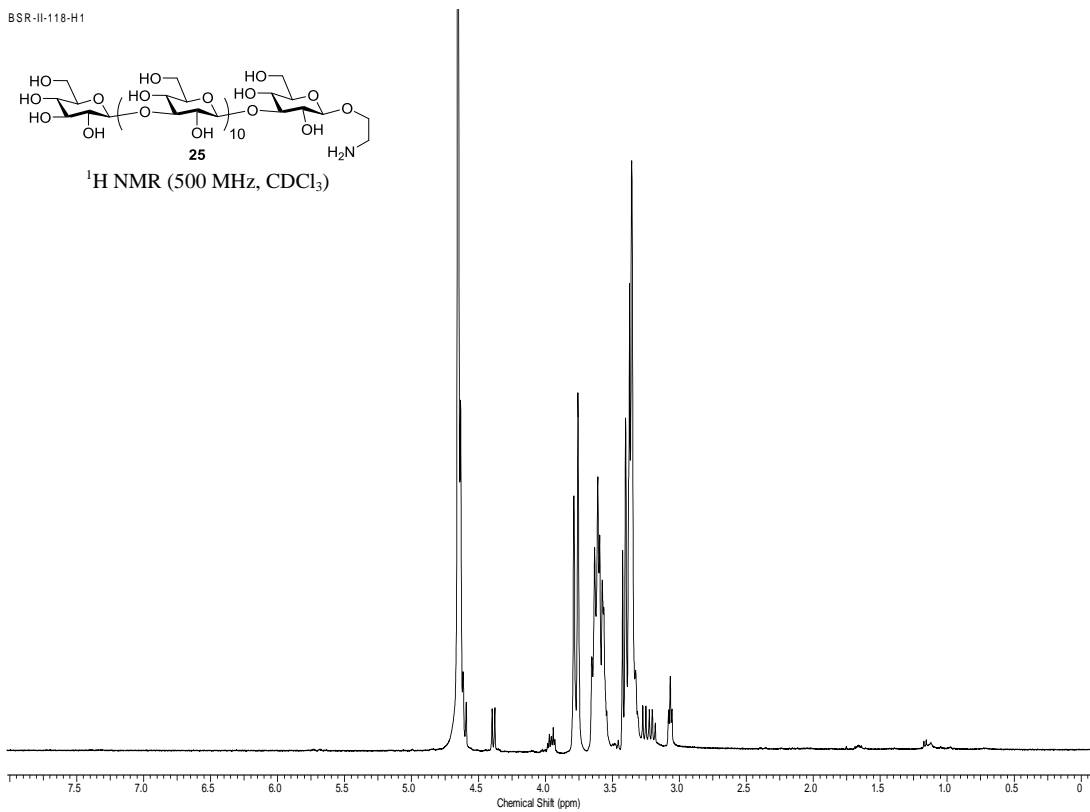liao\_2\_123\_C  
Standard Carbon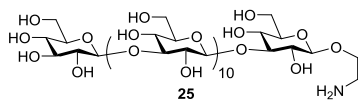 $^{13}\text{C NMR}$  (125 MHz,  $\text{CDCl}_3$ )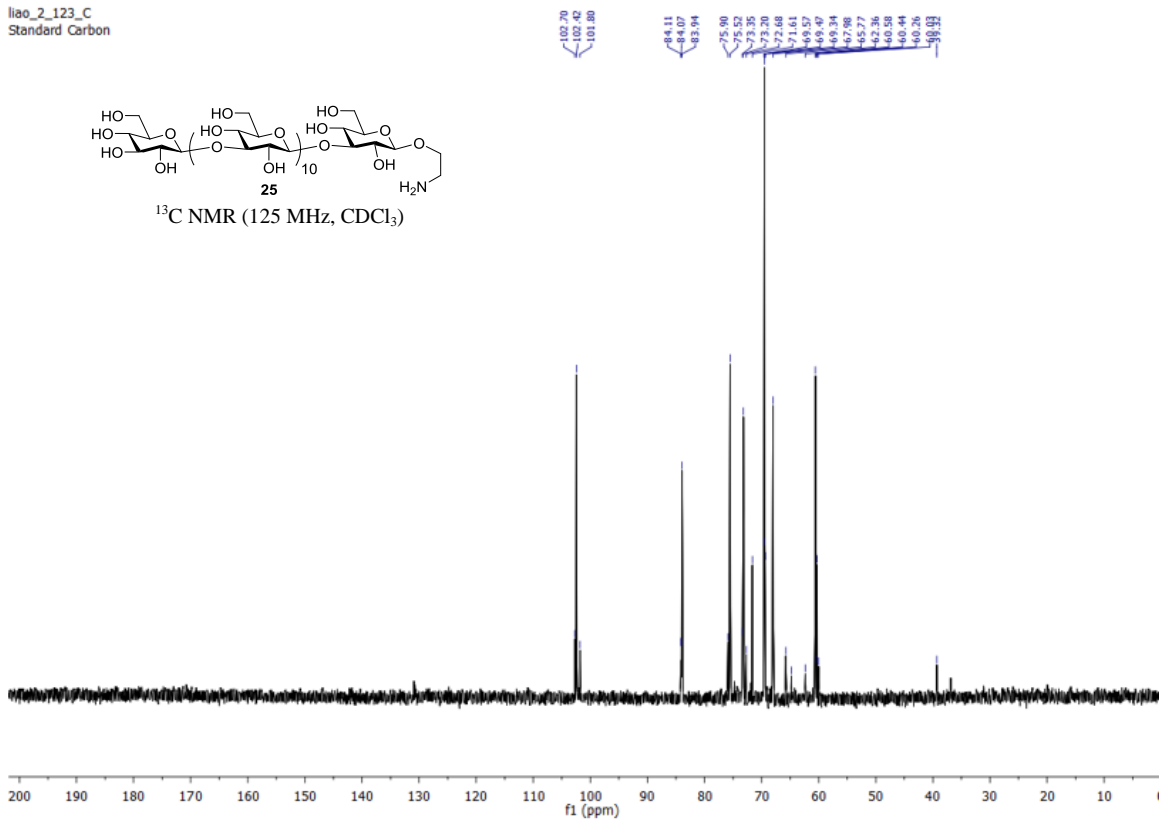



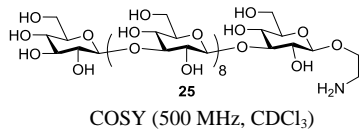COSY (500 MHz,  $\text{CDCl}_3$ )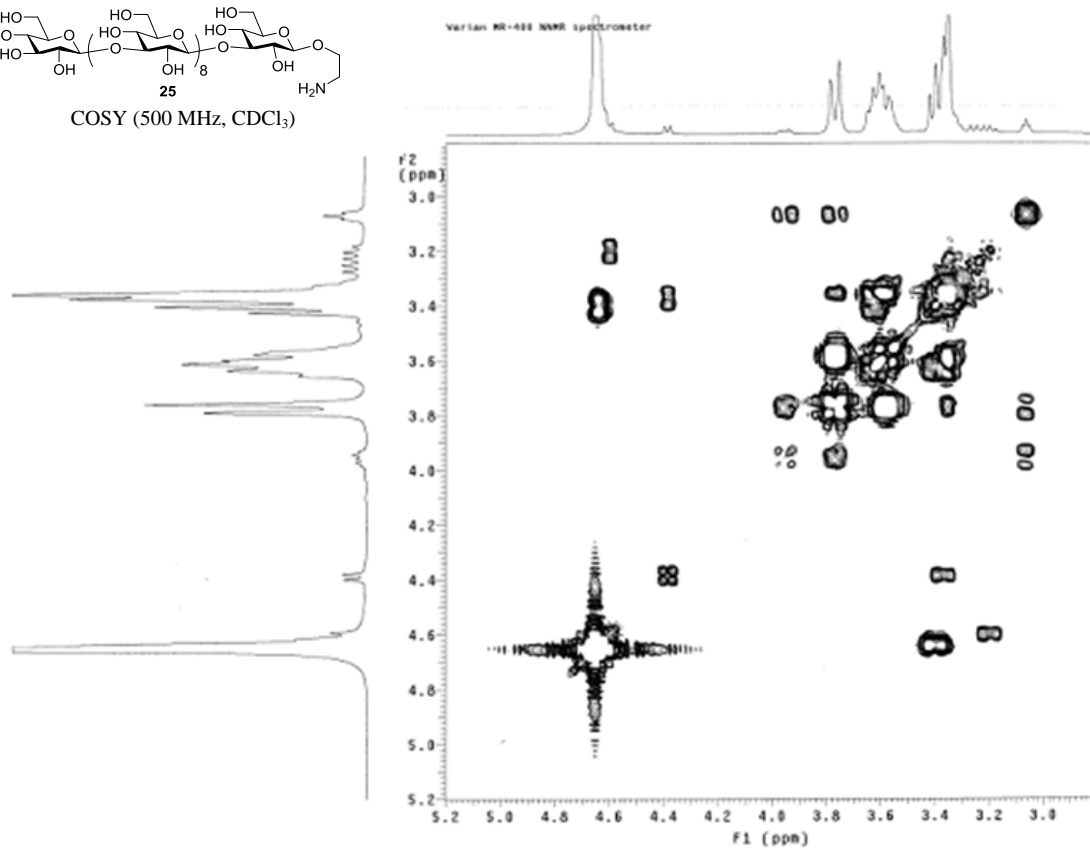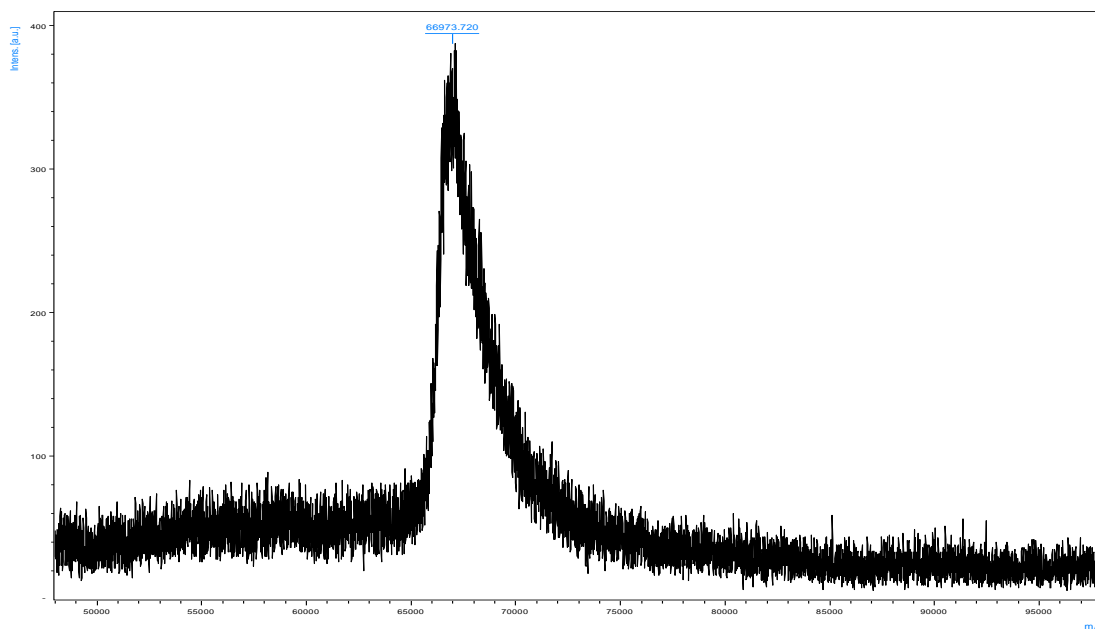

MALDI TOF MS spectrum of HSA protein

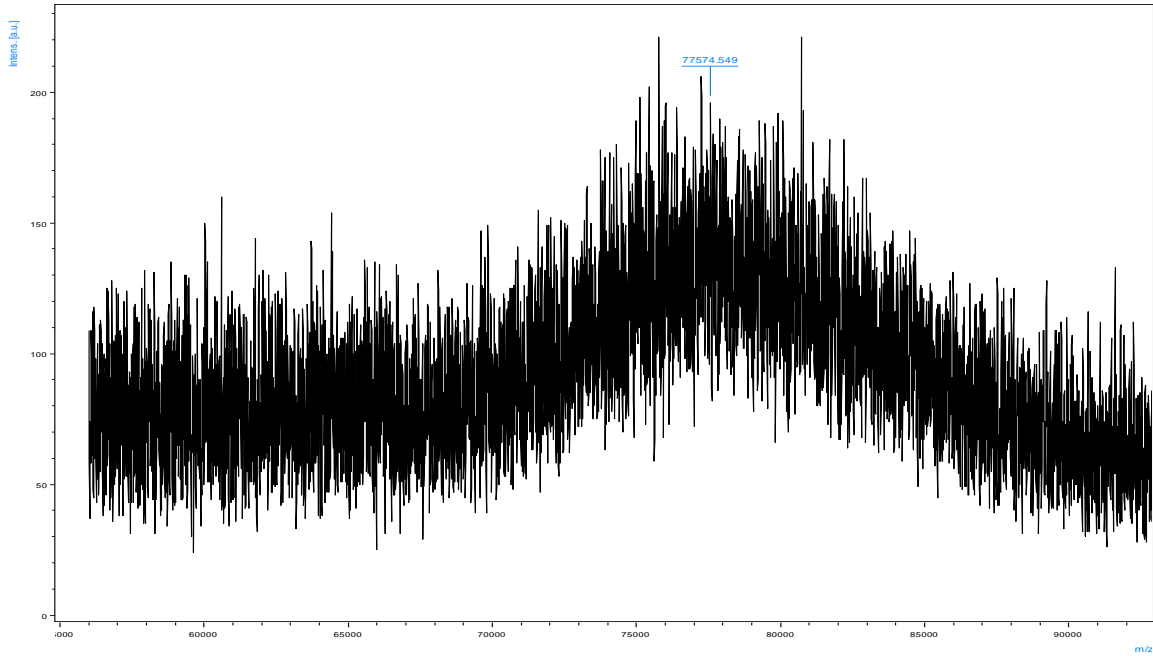

MALDI TOF MS spectrum of HSA-hexasaccharide conjugate **5**

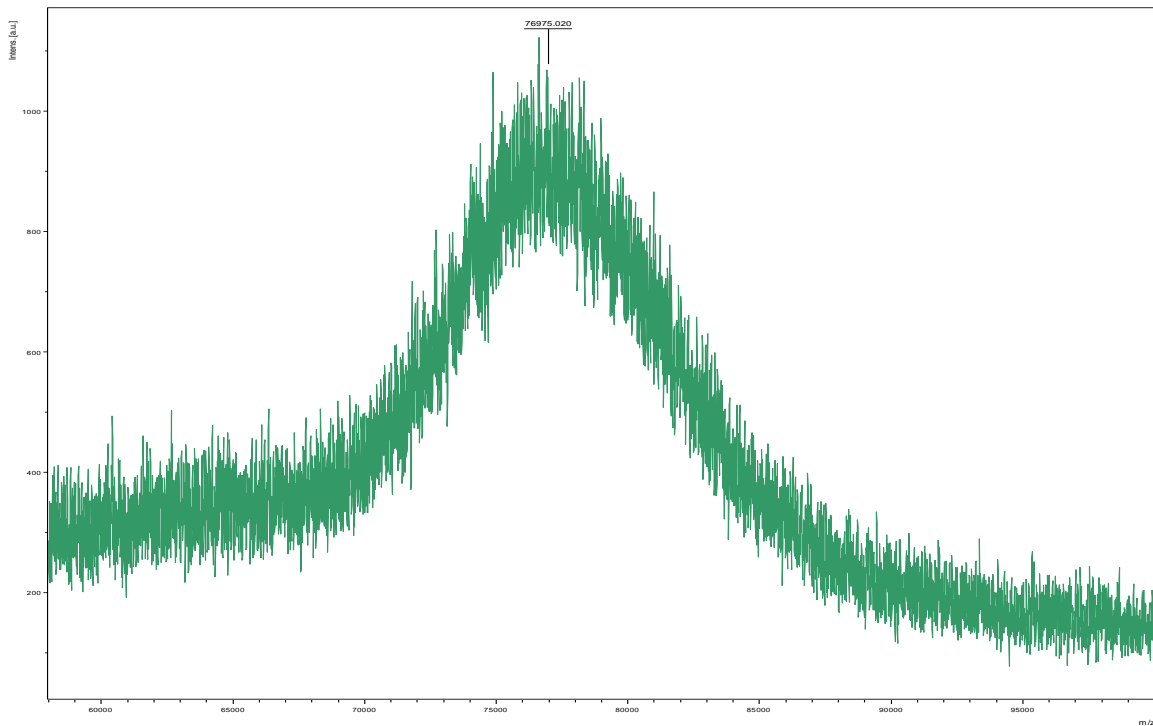

MALDI TOF MS spectrum of HSA-octasaccharide conjugate **6**

S35

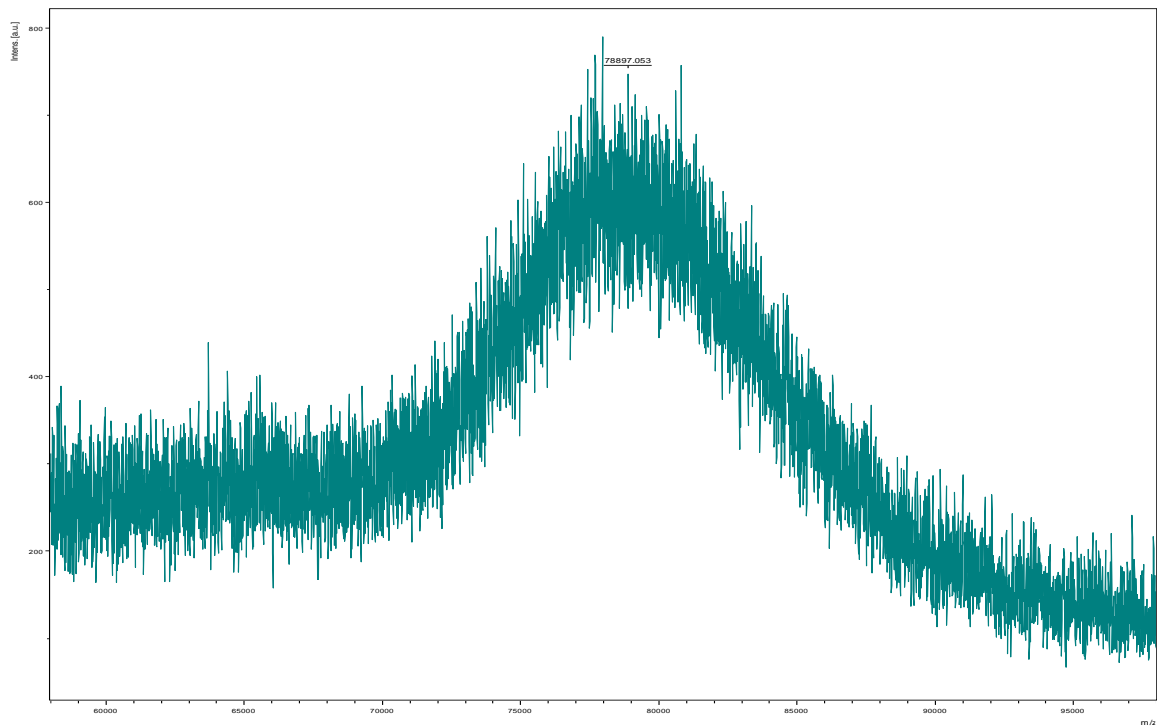

MALDI TOF MS spectrum of HSA-decasaccharide conjugate **7**

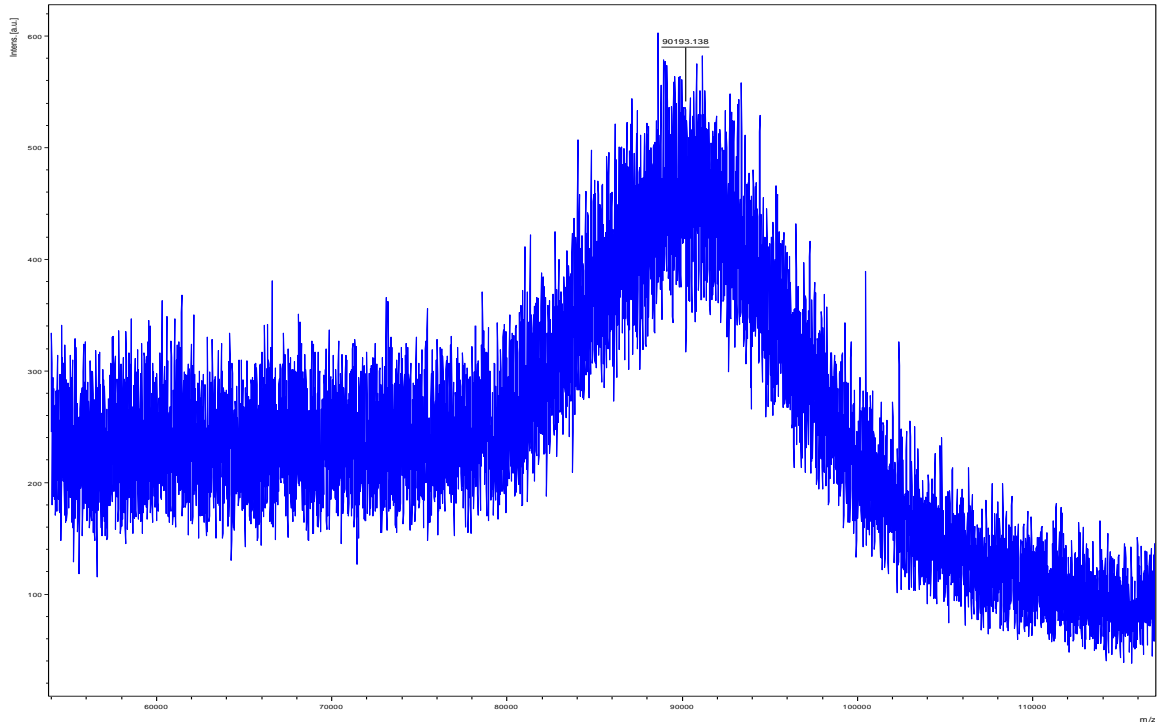

MALDI TOF MS spectrum of HSA-dodecasaccharide conjugate **8**
